## Reduced mitochondrial lipid oxidation leads to fat accumulation in myosteatorsis

Jonathan P Gumucio<sup>1,2</sup>, Austin H Qasawa<sup>1</sup>, Patrick J Ferrara<sup>3</sup>, Afshan N Malik<sup>4</sup>, Katsuhiko Funai<sup>3</sup>, Brian McDonagh<sup>5</sup>, Christopher L Mendias<sup>1,2,6,7,\*</sup>

Departments of <sup>1</sup>Orthopaedic Surgery and <sup>2</sup>Molecular & Integrative Physiology, University of Michigan, Ann Arbor, MI, USA

<sup>3</sup>Diabetes & Metabolism Research Center, University of Utah, Salt Lake City, UT, USA

<sup>4</sup>Diabetes Research Group, Division of Diabetes and Nutritional Sciences, Faculty of Life Sciences and Medicine, King's College London, London, UK

<sup>5</sup>Department of Physiology, School of Medicine, National University of Ireland, Galway, Ireland

<sup>6</sup>Hospital for Special Surgery, New York, NY, USA

<sup>7</sup>Department of Physiology & Biophysics, Weill Cornell Medical College, New York, NY USA

*Running Title:* Lipid accumulation in myosteatorsis

*\*Corresponding author*

Christopher Mendias, PhD  
Hospital for Special Surgery  
535 E 70th St  
New York, NY 10021  
USA  
+1 212-606-1785 office  
+1 212-249-2373 fax  
mendiasc@hss.edu

## Non-Standard Abbreviations

2PG+3PG, 2-phosphoglycerate and 3-phosphoglycerate; ADP, adenosine diphosphate; AMP, adenosine monophosphate; ATP, adenosine triphosphate; CIT+ICIT, citrate and isocitrate; CMP, cytidine monophosphate; F6P+G6P, fructose-6-phosphate and glucose-6-phosphate; FAD, flavin adenine dinucleotide; GDP, guanosine diphosphate; GMP, guanosine monophosphate; NAD, nicotinamide adenine dinucleotide; NADP, nicotinamide adenine dinucleotide phosphate; R5P+X5P, ribulose 5-phosphate and xylulose 5-phosphate; UDP, uridine diphosphate; UMP, uridine monophosphate; UTP, uridine triphosphate.

## Abstract

Myosteatosis is the pathological accumulation of lipid that can occur in conjunction with atrophy and fibrosis following skeletal muscle injury. Little is known about the mechanisms by which lipid accumulates in myosteatosis, but many clinical studies have demonstrated the degree of lipid infiltration negatively correlates with muscle function and regeneration. Our objective was to determine the pathological changes that result in lipid accumulation in injured muscle fibers. We used a rat model of rotator cuff injury in this study, as the rotator cuff muscle group is particularly prone to the development of myosteatosis after injury. Muscles were collected from uninjured controls, or 10, 30, or 60 days after injury, and analyzed using a combination of muscle fiber contractility assessments, RNA sequencing, and undirected metabolomics, lipidomics and proteomics, along with bioinformatics techniques, to identify potential pathways and cellular processes that are dysregulated after rotator cuff tear. Bioinformatics analyses indicated that mitochondrial function was likely disrupted after injury. Based on these findings, and given the role that mitochondria play in lipid metabolism, we then performed targeted biochemical and imaging studies and determined that mitochondrial dysfunction and reduced fatty acid oxidation likely leads to the accumulation of lipid in myosteatosis.

**Keywords:** muscle injury, rotator cuff, fatty degeneration, muscle atrophy

## Introduction

Skeletal muscle often displays chronic degenerative changes following injury, including atrophy and weakness of muscle fibers, and fibrotic changes to the extracellular matrix (1-4). Some muscles also display a pathological accumulation of lipid in response to chronic injury or disease, which is referred to as myosteatorsis or fatty degeneration (5, 6). The rotator cuff muscle group, which moves and stabilizes the shoulder joint, is particularly prone to develop myosteatorsis after injury (7). Chronic tears of the rotator cuff, which nearly always involve a tear to the distal tendon, are among the most frequent upper extremity injuries in patients, with over a quarter of a million surgical repairs performed annually in the US (8, 9). Patients with these injuries have a 30% reduction in muscle fiber force production, and degenerative changes to the motor endplate consistent with partial denervation (1, 10). Lipid accumulation in injured rotator cuff muscles is correlated with muscle weakness and poor patient outcomes following surgical repair (7, 11). Additionally, for most patients the muscle does not regain strength and function despite undergoing postoperative strengthening exercises in rehabilitation, and nearly 40% of patients will actually continue to develop more atrophy and fat accumulation after the repair (7). As excess lipid appears to play a negative role in muscle regeneration, developing therapeutic interventions to reduce myosteatorsis may improve outcomes for patients with chronic muscle injuries and diseases. However, the mechanisms that lead to the pathological build-up of lipid within muscle fibers are not well understood.

Our objective in the current study was to gain greater insight into the biochemical pathways and cellular factors that lead to myosteatorsis after skeletal muscle injury. We used a rat model of rotator cuff tears, in which the supraspinatus muscle was avulsed from the humerus and denervated, and muscles were harvested either 10, 30 or 60 days after the injury, and compared to supraspinatus muscles of uninjured rats. We divided the study into two parts. First, we evaluated changes in muscle fiber force production and performed a broad analysis of the changes in the muscle lipidome, metabolome, transcriptome, and proteome using mass spectrometry and RNA-sequencing techniques. Bioinformatics tools were used to identify potential cellular processes and molecular targets that were disrupted as a result of rotator cuff injury. This analysis identified mitochondrial dysfunction as a strong candidate in causing pathological changes after muscle injury. Based on these results, in the second half of the study we tested the hypothesis that pathological lipid accumulation occurs in torn rotator cuff muscles due to mitochondrial dysfunction and reduced lipid oxidation.

## Methods

**Animals.** This study was approved by the University of Michigan IACUC. Forty adult male Sprague Dawley rats were used in this study (N=10 per group). The rat rotator cuff tenectomy and denervation model was chosen due to anatomical similarity to humans, and because the model mimics many of the pathological changes observed in patients with chronic rotator cuff tears (1, 3, 12-14). Bilateral supraspinatus (SSP) tears were administered as previously described (12, 14, 15). Animals were deeply anesthetized with 2% isoflurane, and the surgical area was shaved and scrubbed with chlorhexidine. A deltoid-splitting transacromial approach was used to expose the supraspinatus tendon, and a tenectomy was performed to remove the tendon and prevent spontaneous reattachment to the humerus or surrounding fascia. Following tenectomy, the suprascapular nerve was located, and approximately a 3-4mm segment was removed to denervate the muscle. The deltoid muscle and skin were then closed, and the animals were allowed to recover in their cages. Rats were treated with buprenorphine twice post-operatively (0.05mg/kg, Reckitt, Parsippany, NJ, USA) and a single dose of carprofen (5mg/kg, Zoetis, Parsippany, NJ, USA). Animals were closely monitored thereafter for signs of pain or distress. After a period of either 10, 30, or 60 days, animals were anesthetized with sodium pentobarbital (40mg/kg, Vortech Pharmaceuticals, Dearborn, MI, USA), and supraspinatus muscles were harvested, weighed, and prepared for either histology, single fiber contractility, or finely minced and snap frozen in 25-50mg aliquots for biochemical and molecular biology measures. Animals were then euthanized by overdose of sodium pentobarbital followed by induction of a bilateral pneumothorax.

**Histology.** Histology was performed as described (12). Distal portions of the supraspinatus were placed in tragacanth gum and snap frozen in isopentane cooled with liquid nitrogen. Ten micron sections were fixed with 4% paraformaldehyde, and then incubated in 0.2% Triton-X 100 and then stained with wheat germ agglutinin (WGA) conjugated to AlexaFluor 555 (Thermo Fisher, Waltham, MA, USA) to label the extracellular matrix, DAPI (Sigma, Saint Louis, MO, USA) to identify nuclei, and BODIPY 493/503 (Thermo Fisher) to label neutral lipids. To calculate fiber cross-sectional areas (CSAs), images of WGA and DAPI stained sections were taken on an EVOS FL microscope (Thermo Fisher), and CSAs were calculated using ImageJ (NIH). Images stained with WGA, DAPI, and BODIPY were taken using an AxioPhot system (Zeiss, Thornwood, NY, USA).

**Muscle Fiber Contractility.** The contractility of chemically permeabilized muscle fibers was performed as described (1, 12). Briefly, fiber bundles were dissected from the proximal region of SSP muscles, placed in skinning solution for 30 min, and then in storage solution for 16 h at 4°C, followed by storage at -80°C. On the day of contractility testing, samples were thawed slowly on ice, and individual fibers were pulled from bundles using fine mirror-finished forceps. Fibers were then placed in a chamber containing relaxing solution and secured at one end to a servomotor (Aurora Scientific, Aurora, ON, Canada) and the other end to a force transducer (Aurora Scientific) with two ties of 10-0 monofilament nylon suture. Using a laser diffraction

measurement system, fiber length was adjusted to obtain a sarcomere length of 2.5 $\mu$ m. The average fiber CSA was calculated assuming an elliptical cross-section, with diameters obtained at five positions along the length of the fiber from high-magnification images taken from top and side views. Maximum isometric force ( $F_o$ ) was elicited by immersing the fiber in a high calcium activation solution. Specific maximum isometric force ( $sF_o$ ) was calculated by dividing  $F_o$  by fiber CSA. Fibers were categorized as fast or slow by examining their force response to rapid, constant-velocity shortening, and ten to twenty fast fibers were tested from each SSP muscle.

**Western blots.** Western blots were performed as described (16). Protein was isolated from snap frozen 25mg aliquots of muscle tissue and placed in 500 $\mu$ L of a solution containing TPER (Thermo Fisher) with 1% NP-40 and 1% protease-phosphatase inhibitor (Thermo Fisher). Samples were homogenized, vortexed at 4°C for 30 min, then centrifuged at 12,000g for 15 min at 4°C. The supernatant was collected and saved at -80°C until use. The pellets of insoluble proteins were saved for hydroxyproline assays, as described below. Protein concentration was determined with a BCA assay (Thermo Fisher). Twenty micrograms of protein were loaded into 6-12% polyacrylamide gels, and subjected to electrophoretic separation. Proteins were transferred onto nitrocellulose membranes (Bio-Rad) and blocked for 1h in 3-5% skim milk. Membranes were rinsed and incubated overnight in primary antibodies at a concentration of 1:1000, against either glutathione (Virogen, Watertown, MA, USA, 101A) succinate dehydrogenase-A (SDHA, Cell Signaling, Danvers, MA, USA, 11998), cytochrome c oxidase subunit 4 (COX4, Cell Signaling 4850), phospho-insulin-like growth factor-1 receptor (p-IGF1R) Y<sup>1135</sup> (Cell Signaling 3918), IGF1R (Cell Signaling 9750), phospho-ERK1/2 T<sup>202</sup>/Y<sup>204</sup> (Cell Signaling 4370), ERK1/2 (Cell Signaling 4695), phospho-Akt S<sup>473</sup> (Cell Signaling 4060), Akt (Cell Signaling 4691), phospho-p70S6 Kinase (p-p70S6K) T<sup>389</sup> (Cell Signaling 9234), phospho-p70<sup>S6K</sup> T<sup>421</sup>/S<sup>424</sup> (Cell Signaling 9204), p70<sup>S6K</sup> (Cell Signaling 2708), phospho-ribosomal protein S6 (p-rpS6) S<sup>235</sup>/S<sup>236</sup> (Cell Signaling 4858), rpS6 (Cell Signaling 2217), p62 (AbCam, Cambridge, UK, 129012), ULK1 (AbCam 128859), PINK1 (AbCam 23707), Parkin (AbCam 15954), Prdx3 (AbCam 128953), or Prdx6 (AbCam 133348). After primary antibody incubation, membranes were rinsed and incubated in goat anti-rabbit or goat anti-mouse horseradish peroxidase-conjugated secondary antibodies (from either AbCam or Cell Signaling). Proteins were detected using Clarity Western ECL Substrate (Bio-Rad) or Super Signal West Dura (Thermo Fisher), and imaged and quantified using a ChemiDoc chemiluminescent detection system (Bio-Rad). Coomassie or Ponceau S staining of membranes was performed to verify equal protein loading.

**Hydroxyproline content.** Hydroxyproline was measured from the insoluble fraction remaining from the isolation of soluble proteins for western blots. Pellets were dried at 100°C overnight, weighed immediately, and then hydrolyzed in 12M hydrochloric acid. Samples were then evaporated in a SpeedVac (Thermo Fisher) and hydroxyproline was determined using a colorimetric assay as described previously (17).

**Electron Microscopy.** Portions of distal supraspinatus muscles were fixed in 1% tannic acid, 1% glutaraldehyde in Sorenson's buffer, followed by post-fixation in 2% osmium tetroxide (Electron Microscopy

Sciences, Hatfield, PA, USA). Samples were then dehydrated using a graded ethanol series and embedded in EMBED 812 (Electron Microscopy Sciences) using a graded resin and propylene oxide series. One micron transverse sections were cut with a diamond knife ultramicrotome, and imaged using a JEOL 1400-plus transmission electron microscope (JEOL USA, Peabody, MA, USA) with a high-resolution AMT digital camera (AMT, Woburn, MA, USA).

**Lipidomics and metabolomics.** The University of Michigan Metabolomics Core performed mass spectrometry based shotgun lipidomics and metabolomics measurements from snap frozen, homogenized muscle samples as described (18, 19). For lipidomics, lipids were extracted from samples with a solvent mixture consisting of 2:2:2 (v/v/v) methanol:dichloromethane:water mixture at room temperature after adding internal standard mixture. After drying, the samples were resuspended in a solution containing 1:5:85 (v/v/v) acetonitrile:water:isopropanol and 10mM ammonium acetate. Samples were then subjected to liquid chromatography-mass spectrometry (LC-MS), and MS peaks were matched in-silico with LipidBlast (20). Quantification was performed by MultiQuant software (AB-SCIEX, Framingham, MA, USA). For metabolomics, metabolites were extracted from frozen muscle in a solvent mixture containing 8:1:1 methanol:chloroform:water (v/v/v). Reverse phase liquid chromatography-tandem quadrupole MS was used to measure acylcarnitines (21). Other metabolites were derivatized and analyzed with gas chromatography-MS. Quantification of metabolites was performed using Masshunter Quantitative Analysis software (Agilent Technologies, Santa Clara, CA, USA). Normalized abundance data for all measured metabolites is provided in Supplemental Table 1.

**RNA Sequencing (RNA-seq) and Gene Expression.** Snap frozen aliquots of muscle tissue were homogenized in QIAzol (Qiagen, Valencia, CA) and isolated using a miRNeasy kit (Qiagen). RNA concentration was determined using a NanoDrop 2000 (Thermo Fisher). For each sample, 250ng total RNA was delivered to the University of Michigan Sequencing Core for RNA sequencing (RNA-seq) analysis. Sample concentrations were normalized and cDNA pools were created for each sample, and then subsequently tagged with a barcoded oligo adapter to allow for sample specific resolution. Sequencing was carried out using an Illumina HiSeq 2500 platform (Illumina, San Diego, CA, USA) with 50bp single end reads. Raw RNA-seq data was quality checked using FastQC v0.10.0 (Barbraham Bioinformatics, Cambridge, UK). Alignment to the reference genome (rn5, UCSC), differential expression based on counts per million mapped reads (CPM), and post-analysis diagnostics were carried out using the Tuxedo Suite software package (22). RNA-seq data has been deposited to NIH GEO (accession GSE103266), and normalized CPM values for all measured genes is provided in Supplemental Table 1.

To validate fold-change RNA-seq data, we performed quantitative PCR (qPCR) on a select set of genes. RNA was reverse transcribed into cDNA with iScript Reverse Transcription Supermix (Bio-Rad, Hercules, CA, USA). Amplification of cDNA was performed in a CFX96 real-time thermal cycler (Bio-Rad) using iTaq



Universal SYBR Green Supermix (Bio-Rad). Target gene expression was normalized to the stable housekeeping gene Eif2b2, and further normalized to 0d samples using the  $2^{-\Delta\Delta Ct}$  method. Primer sequences are provided in Supplemental Table 2.

**Proteomics.** Label-free proteomic analysis was performed as described (23). Aliquots were homogenized in 50mM ammonium bicarbonate containing 25mM N-ethylmaleimide (d(0) NEM), pH 8. Protein lysates were prepared by centrifugation at 15,000g for 10min at 4°C and protein concentrations were calculated using a Bradford assay (BioRad) with BSA as a standard. Excess d(0) NEM was removed using Zeba desalting columns (Thermo Scientific), and protein concentrations were determined again by Bradford assay as before. A total of 100µg of protein extract was diluted to 160µl with 25mM ammonium bicarbonate and denatured by the addition of 10µl of 1% RapiGest (Waters, Manchester, UK) in 25 mM ammonium bicarbonate and incubated at 80°C for 10min with shaking. Then 10µl of a 100mM solution of Tris(2-carboxyethyl)phosphine hydrochloride (TCEP) was added to reduce reversibly oxidised Cys residues, followed by incubation at 60°C for 10min. Newly reduced Cys were then alkylated by addition of d(5) NEM and incubated at room temperature for 30min. An aliquot of the samples was used at this point to check procedure by SDS-PAGE. Proteolytic digestion was performed by addition of trypsin followed by overnight incubation at 37°C. Digestion was terminated and RapiGest removed by acidification (3µl of TFA and incubated at 37°C for 45min) and centrifugation (15,000g for 15min).

Samples were analyzed using an Ultimate 3000 RSLC Nano system (Thermo Scientific) coupled to a QExactive mass spectrometer (Thermo Scientific). A total of 2 µl of sample corresponding to 1 µg of protein was diluted in 18 µl buffer (97% H<sub>2</sub>O, 3% MeCN and 0.1 % formic acid v/v) and 5µl (250ng of protein) was loaded onto the trapping column (PepMap 100, C18, 75µm x 20mm, Thermo Fisher) using partial loop injection for 7min at a flow rate of 4µL/min with 0.1% (v/v) TFA. Samples were resolved on the analytical column (EASY-Spray C18 75µm x 400mm, 2µm column, Thermo Fisher) using gradient of 97% A (0.1% formic acid) and 3% B (99.9% ACN and 0.1% formic acid) to 60% A and 40% B over 120 min at a flow rate of 300nL/min. Data dependent acquisition consisted of a 70,000 resolution full-scan MS scan (AGC set to 10<sup>6</sup> ions with a maximum fill time of 250ms) and the 10 most abundant peaks were selected for MS/MS using a 17,000 resolution scan (AGC set to 5 x 10<sup>4</sup> ions with a maximum fill time of 250ms) with an ion selection window of 3m/z and normalized collision energy of 30. Repeated selection of peptides for MS/MS was avoided by a 30sec dynamic exclusion window.

Label-free relative quantification was performed using PEAKS7 software (Bioinformatics Solutions Inc., Waterloo, Ontario, Canada). The acquired Thermo RAW data files were searched against UniProt rat database (2015-29-07, 32,991 sequences) and analyzed using the following parameters: peptide mass tolerance 10ppm; fragment mass tolerance 0.01Da, 1+, 2+, 3= ions; missed cleavages. Variable modifications included in search were: d(0) NEM, d(5) NEM, mon-, di-, trioxidation of Cys residues and oxidation of methionine with a



FDR of < 1% and searched against the UniProt rat database. Normalization was carried out using the total ion current. PEAKS7 software includes a post-translational modification (PTM) algorithm applying the de novo sequencing module to search for a limited number of PTMs. All identified PTMs using this method adhere to the above search criteria and FDR validation. All proteomics data has been deposited to the Proteome Xchange Consortium (accession PXD009034), and normalized abundance data for all measured proteins is provided in Supplemental Table 1.

**Bioinformatics.** Expression data from RNA-seq measurements was imported into Ingenuity Pathway Analysis (IPA) software (Qiagen) to assist in predicting cellular and molecular pathways and processes involved in myosteatosis. For metabolomics, lipidomics, and proteomics measures, MS peak data was imported into MetaboAnalyst 4.0 software (24) for data visualization, principal component analysis (PCA), and statistical analyses.

**Mitochondrial DNA (mtDNA) measurements.** Mitochondrial genome copy number quantification was performed with modifications from a previous study (25). Total DNA was isolated from aliquots of muscle tissue using the DNeasy Blood and Tissue Kit (Qiagen). DNA was amplified via qPCR as described above with custom primers for mtDNA and beta-2-microglobulin (B2M) genomic DNA (Supplemental Table 2). Using known standards of rat DNA, standard curves were generated for each primer set to determine number of copies of either mtDNA or gDNA. The ratio of mtDNA to gDNA was calculated per sample and averaged across groups.

**Mitochondrial enzymatic assays.** Fifty milligrams of freshly minced supraspinatus tissue was isolated and placed in 500μL of ice cold PBS containing protease inhibitor (Thermo Fisher). Samples were homogenized and then 100μL of 10% laurel maltoside, and 400μL cold PBS with protease inhibitor was further added. Samples were incubated on ice for 30 min and then centrifuged at 12,000g for 20 min at 4°C. Samples were stored at -80°C until use. On the day of measurement, samples were thawed on ice, and protein concentration was determined using a BCA assay (Thermo Fisher). Colorimetric enzymatic assays for mitochondrial complex I, II, and IV were performed as per the protocol acquired from the manufacturer (AbCam). Sample concentration was optimized per assay in pilot experiments, and equal protein was loaded per well. Samples were measured in duplicate in a BioTek Epoch2 microplate spectrophotometer (BioTek, Winooski, VT, USA). Optical density of enzymatic activity per minute (mOD/min) was calculated per the manufacturer protocol.

**Pyruvate and palmitate oxidation measurements.** Samples were placed into ice-cold medium containing 250mM sucrose, 1mM EDTA, 10mM Tris-HCl, and 2mM ATP (pH 7.4). To isolate intact mitochondria, muscles were finely minced in 20μL of medium per milligram of muscle, and homogenized in a glass homogenization tube with a motor-driven Teflon pestle (26). Pyruvate and palmitate oxidation assays were performed as previously described with minor modification (27). Briefly, 80μL of tissue homogenate was

added to incubation wells on a sealed, modified, 48-well plate with a channel cut between the adjacent trap wells. The trap wells contained 200 $\mu$ L of 1M sodium hydroxide for the collection of liberated  $^{14}\text{CO}_2$ . Two volumes of incubation buffer (100mM sucrose, 10mM Tris-HCl, 5mM potassium phosphate, 80mM potassium chloride, 1mM magnesium chloride, 0.1mM malate, 2mM ATP, 1mM dithiothreitol, 0.2mM EDTA, 1mM L-carnitine, 0.05mM coenzyme A, and 0.5% fatty acid-free bovine serum albumin, pH 7.4) was added to the wells to initiate the reaction with 1mM pyruvate ([2- $^{14}\text{C}$ ]pyruvate at 0.5 $\mu$ Ci/mL) or 0.2mM palmitate ([1- $^{14}\text{C}$ ]palmitate at 0.5 $\mu$ Ci/mL). Following 60 min of incubation at 37°C, 100 $\mu$ l of 70% perchloric acid was added to terminate the reaction. The trap wells were sampled for label incorporation into  $^{14}\text{CO}_2$ , which was determined by scintillation counting using 4mL of Uniscint BD (National Diagnostics, Atlanta, GA, USA).

**Statistics.** Differences between groups were measured using one-way ANOVAs ( $\alpha=0.05$ ) followed by Fisher's LSD post hoc sorting ( $\alpha=0.05$ ), or Kruskal-Wallis tests ( $\alpha=0.05$ ) followed by Dunn's post-hoc sorting ( $\alpha=0.05$ ). A FDR multiple observation adjustment ( $q<0.05$ ) was applied to metabolomic, lipidomic, proteomic, and RNA-seq data. Statistical analyses were performed using Prism 6.0 (GraphPad), Tuxedo, or MetaboAnalyst 4.0 (24).

## Results

Following muscle injury, the mass of muscles and size of muscle fibers decreased over time (Figure 1A-B). Collagen content also accumulated after muscle injury, with a near 4-fold increase at 30 and 60 days compared to controls (Figure 1C). An accumulation of lipids within muscle fibers was noted after muscle injury, both on histology and electron microscopy, as well as disrupted myofibril architecture (Figure 1D and 2A). Centrally located nuclei were also noted 10 days after injury (Figure 1D). In addition to a reduction in size, muscle fibers were also weaker, both in terms of absolute maximum isometric force and specific force (Figure 2B-D).

Given the reduction in muscle fiber size, we then measured activation of the IGF1 and ERK pathways, due to their importance in maintaining muscle mass (Figure 3A-G). Reduced proximal IGF1 and ERK signaling was observed after muscle injury, with corresponding reductions in Akt S<sup>473</sup> and p70S6K T<sup>421</sup>/S<sup>424</sup>, although rpS6 S<sup>235</sup>/S<sup>236</sup> phosphorylation was increased 10 and 30 days after muscle injury (Figure 3A-G).

To further quantify and explore the grossly apparent lipid that accumulated after rotator cuff tear, we performed shotgun lipidomics and detected 457 lipid species, with summary data presented in Figure 4. In general, PCA analysis demonstrated that the 10 day injury group diverged somewhat from uninjured muscles, while the 30 and 60 day injury groups were fairly distinct from uninjured muscles but had some overlap with the 10 day group (Figure 4A). For free fatty acids (FFAs), there was an increase in oleate, palmitate, and stearate 30 and 60 days after rotator cuff tear (Figure 4B). Triglycerides were the major class of lipid species measured in muscle tissues and increased by over 3-fold at the 60 day time point (Figure 4C). Ceramide phosphates, sphingomyelins, phosphatidylglycerols, phosphatidylinositols, phosphatidylserines (Figure 4G-H, J-L) displayed similar patterns of change as triglycerides, while diglycerides, monoglycerides, cholesterol esters, phosphatidic acids, phosphatidylcholines, phosphatidylethanolamines, lysophosphatidylcholines, lysophosphatidylethanolamines, and plasmalogen-phosphatidylcholines (Figure 4D-F, I, M-Q) displayed biphasic responses. No difference in plasmalogen-phosphatidylethanolamines (Figure 4R) were observed.

Next, we analyzed the levels of 68 small molecule metabolites important for muscle function. Select metabolites are presented in Figure 5, with additional species listed in Supplemental Table 1. There was a general similarity of metabolites at the 0 and 10 day time points, and at the 30 and 60 day time points (Figure 5A). Several nucleoside and nucleotide metabolites, such as ADP, CMP, GMP, NAD, and UMP decreased after rotator cuff tear (Figure 5B). An increase in metabolites involved in glycolysis and pentose phosphate metabolism, such as fructose-bisphosphate, hexoses, hexose-phosphate, and phosphoenolpyruvate increased at 30 and 60 days after muscle injury (Figure 5D). There were changes in only a few free amino acids such as alanine, aspartate, threonine, and tryptophan (Figure 5E), and no changes were observed in the creatine phosphate shuttle, Krebs's cycle metabolites, or free glutathione after injury (Figure 5C, F, and H).

We then performed RNA-seq to analyze global changes in the transcriptome of injured muscles. The PCA analyses demonstrated divergence across the different time points, with the 10 and 30 day time points demonstrating the most difference from controls (Figure 6A). IPA was used to identify potential biological pathways and functions that were affected by rotator cuff tear, and we observed several processes related to lipid metabolism and mitochondrial function, reactive oxygen species (ROS) production, glycolysis, muscle contraction, extracellular matrix (ECM) production, and inflammation that were predicted to be differentially regulated in myosteatosis (Figure 6B). We then selected numerous genes related to these processes from RNA-seq to further explore, and report in Figure 6. We also performed qPCR to validate selected genes from the different categories, and generally observed similar trends in differential regulation between RNA-seq and qPCR data (Table 1).

Ten days after rotator cuff tear, there was a general trend for a downregulation in genes involved in muscle contraction, such as the myosin heavy chain genes (*Myh1*, *Myh2*, *Myh4*, and *Myh7*) and other sarcomeric genes (*Mybpc1*, *Mybpc2*, *Myf11*, *Mypn*, *Tnni2*), as well as an increase in the membrane repair gene dysferlin (*Dysf*, Figure 6C and Table 1). Many of these genes returned to baseline by 60 days, although of note embryonic myosin heavy chain (*Myh3*) remained elevated throughout the study (Figure 6C and Table 1).

Numerous autophagy and proteosome genes such as beclin-1 (*Becn1*), m-calpain (*Capn2*), and MUSA-1 (*Fbxo30*), were induced 10 days after injury (Figure 6D), as were several genes involved with inflammation, atrophy, and fibrosis, like GDF11, IL1 $\beta$ , and TGF $\beta$  (Figure 6D-E). However, no difference in the atrophy-inducing signaling molecules activin A (*Inhba*) or B (*Inhbb*) and a downregulation in myostatin (MSTN) was observed. IGF1 and BMP7, which can activate pathways that promote muscle hypertrophy, were upregulated after rotator cuff tear (Figure 6E).

Many extracellular matrix genes, such as types I, III, IV, VI, and XIV collagen, elastin (*Eln*), lumican (*Lum*), thrombospondin 4 (*Thbs4*), and tenascin C were upregulated at the 10 or 30 day time points, as were the fibroblast markers S100a4 and scleraxis (Figure 6F).

Genes involved in glycolysis, such as phosphofructokinase (*Pfkm*), aldolase A (*Aldoa*), GAPDH, phosphoglycerate (*Pgk1*), and enolase 3 (*Eno3*), were downregulated at 10 days, with some recovery through to 60 days after injury (Figure 6G).

For fatty acid uptake and triglyceride synthesis genes, there was a general trend for downregulation after rotator cuff tear. Lipoprotein lipase, which hydrolyzes extracellular triglycerides into fatty acids, and the fatty acid transporter CD36 was downregulated after injury (Figure 6H). Acyl-CoA synthetases (*Acs1*) 1 and 6, which are the major enzymes that conjugate fatty acids into fatty acyl Co-As in skeletal muscle were downregulated at all time points after injury, as were AGPAT9/GPAT3 and GPAM, which convert fatty acyl Co-As into lysophosphatidic acids (Figure 6H). Additional genes that were downregulated include the AGPAT1, AGPAT3, and AGPAT6 enzymes that produce phosphatidic acid from lysophosphatidic acid, lipin 1-3 which

dephosphorylate phosphatidic acid to produce diglyceride, and DGAT1 and DGAT2 that produce TG from DG (Figure 6H). While TG synthesis genes were downregulated, the lipid droplet coating gene perilipin 2 (*Plin2*) was upregulated 10 days after rotator cuff tear, while perilipin 5 (*Plin5*) was downregulated. For genes involved with hydrolyzing lipids stored in droplets into fatty acids, including the patatin domain containing proteins (*Plnla2*, *Pnpla3*, *Pnpla7*), hormone sensitive lipase (*Lipe*), and monoglyceride lipase (*Mgll*), were all downregulated after injury (Figure 6J and Table 1).

Enzymes that are responsible for the transport of fatty acids into the mitochondria, and their conversion into fatty acyl-CoAs, ACSM5, ACSS1, CPT1b, carnitine acylcarnitine translocase (*Slc25a20*), and CPT2 were downregulated at 10 and 30 days after injury, although some recovery occurred by 60 days (Figure 6I). For genes involved in  $\beta$ -oxidation of fatty acyl Co-As within the mitochondria, the short, medium and long-chain acyl Co-A dehydrogenases (*Acads*, *Acadm*, and *Acadl*) were all downregulated at 10 and 30 days after injury (Figure 6I).

Similar to  $\beta$ -oxidation genes, Kreb's Cycle and oxidative phosphorylation transcripts were also downregulated after muscle injury, including citrate synthase (*Cs*), aconitase (*Aco2*), isocitrate dehydrogenase (*Idh2*), 2-oxoglutarate dehydrogenase (*Ogdh*), succinyl CoA synthetase (*Suclg1*), succinate dehydrogenase (*Sdha*), fumarase (*Fh*), malate dehydrogenase (*Mdh2*), NDUFS1, cytochrome C1 (*Cyc1*), COX4 (*Cox4il*), and ATP5G1 (Figure 6I). Genes involved in mitochondrial biogenesis, such as PGC1a (*Ppargc1a*) and NRF1 were downregulated 10 days after injury, with no difference in TFAM expression was observed until 30 and 60 days (Figure 6I). MFN1 and MFN2, which promote mitochondrial fission, were also downregulated after rotator cuff tear (Figure 6I).

Genes involved in ROS metabolism were generally upregulated 10 days after injury, including catalase (*Cat*), glutathione peroxidase 3 (*Gpx3*), and thioredoxin (*Txn*), while others such as glutathione peroxidase 1 (*Gpx1*), peroxiredoxin 1 (*Prdx1*), and superoxide dismutase (*Sod1*), were elevated at 60 days compared to controls (Figure 6J). Although mitochondrial  $\beta$ -oxidation genes were downregulated, oxidation of fatty acids can also occur in peroxisomes, in a process mediated by ACOX1, which was upregulated 10 days after injury. In addition to initiating the oxidation of fatty acyl Co-As, ACOX1 produces  $H_2O_2$  that is buffered in peroxisomes by catalase, which was markedly upregulated 10 days after injury (Figure 6J).  $\omega$ -oxidation of fatty acids can also occur as a way to generate acetyl Co-A during times of stress, in a process regulated by CYP4B1, which was upregulated after injury (Figure 6J).

Following the analysis of transcriptional changes, we next sought to determine changes in the proteome after muscle injury. A selection of the 632 proteins detected are presented in Figure 7. The PCA analysis demonstrated that the control and 10 day groups were unique from each other and the 30 and 60 day groups, while the 30 and 60 day groups showed some overlap (Figure 7A). In most cases, we saw general agreement between observed changes in mRNAs and the proteins they encode, including those involved with protein

synthesis and atrophy (Figure 7B), contractile and structural proteins (Figure 7C), extracellular matrix proteins (Figure 7D), metabolic proteins (Figure 7E), and reactive oxygen species proteins (Figure 7F).

Finally, as metabolomic, transcriptomic, and proteomic analyses suggested alterations in lipid oxidation, we sought to evaluate the abundance of lipid species and proteins that are important in mitochondrial function, and the ability of mitochondria to oxidize substrates after rotator cuff tear. While virtually no mitochondria were observed in the peripheral space of control muscles, extensive accumulation of peripheral mitochondria was noted after muscle injury (Figure 8A). There was no change in the ratio of mitochondrial DNA (mtDNA) to genomic DNA (gDNA, Figure 8B). Acylcarnitines and L-carnitine, which shuttle fatty acids between the cytosol and mitochondria, were reduced at all time points after injury (Figure 8C-F). Cardiolipins, which are phospholipids found almost exclusively within the inner mitochondrial membrane, were reduced 10 days after injury but recovered thereafter (Figure 8G). Glutathionylated proteins (Figure 8H), and two proteins that are critical in mitophagy, PINK1 (Figure 8I) and parkin (Figure 8J), were elevated after injury, along with ULK1 (Figure 8K) and p62 (Figure 8L) which play critical roles in mitophagy and autophagy in general. The hydrogen peroxide scavenging enzymes, peroxiredoxin (Prdx) 3 and peroxiredoxin 6, were elevated 10 days after injury, and for Prdx3 remained elevated at 30 and 60 days (Figure 8M-N). Succinate dehydrogenase (SDHA) and COX4 are two critical proteins in mitochondrial respiration, and while succinate dehydrogenase was reduced after injury, COX4 abundance was not different between control and injured muscles (Figure 8O-P). After assessing the abundance of proteins important in mitochondrial physiology, we then performed assays to determine the functional capacity of mitochondrial proteins to metabolize substrates. Complex I, II, and IV activity were reduced 10 days after injury, but recovered by 30 days (Figures 8Q-S). Similar results were observed when we evaluated the ability to oxidize pyruvate and palmitate, with an insufficiency 10 days after injury but recovery thereafter, with pyruvate oxidation nearly doubling 60 days after rotator cuff tear compared to control muscles (Figures 8T-U).



## Discussion

Myosteatosis is a common pathological change observed in certain skeletal muscle groups following injury, and is particularly pronounced in the rotator cuff (7, 8). Fat accumulation is associated with greater muscle weakness and dysfunction in patients with rotator cuff tears (7, 11), and the mechanisms that lead to lipid accretion in myosteatosis are not well understood. Using a translational rat model of myosteatosis, we evaluated changes in muscle fiber force production and broadly profiled the changes in the muscle lipidome, metabolome, transcriptome and proteome, and utilized bioinformatics techniques to help identify potential factors that lead to fat accumulation in myosteatosis. Testing of muscle fiber force, along with electron micrographs, demonstrated a reduction in force production that accompanied disruptions to myofibril alignment and cytoskeletal architecture. Based on the transcriptional bioinformatics and supporting lipidomics, metabolomics, and electron micrographs, we then formulated the hypothesis that pathological lipid accumulation occurs in torn rotator cuff muscles due to mitochondrial dysfunction and reduced lipid oxidation. In support of this hypothesis, we observed a reduced capacity of mitochondria to oxidize lipids early in the injury process, along with transcriptional changes indicative of increased lipid droplet storage with reduced fatty acid uptake and mobilization from lipid droplet stores. Although mitochondrial function appears to recover at later time points, there is a general increase in glycolytic metabolites in muscles and a greater capacity to oxidize pyruvate. These findings support the notion that myosteatosis occurs due to a reduction in mitochondrial lipid oxidation, and not due to increased uptake of circulating lipids into the muscle. A summary of the pathological changes that occur after rotator cuff tear, and the relationships between these changes, is presented in Figure 9.

Shoulder weakness is a common observation in patients with rotator cuff tears, and this often does not recover even after successful repair of the torn tendon and completion of post-operative rehabilitation and strengthening programs (7, 11, 28). Satellite cells, which are myogenic progenitor cells that play an important role in regenerating muscle after injury, are found in equal abundance between untorn and fully torn rotator cuff muscles and display similar in vitro proliferative and fusion capacity (29), indicating that satellite cell dysfunction is unlikely to be responsible for the persistent dysfunction in patients who undergo rotator cuff repair. Despite apparently normal satellite cell activity, disordered sarcomere organization and reduced muscle force production has been reported in patients with chronic rotator cuff tears and animal models of chronic rotator cuff disease (1, 11, 12, 30, 31). However, less was known about subacute changes in contractile function after rotator cuff tear, and how this changes over time. In the current study, we observed a reduction in force production that occurred 10 days after the injury, continuing to decline by 30 days, with some recovery by 60 days. Electron micrographs demonstrated early sarcomere streaming, with the most grossly disorganized appearance of myofibrils at 30 days. By 60 days, myofibril organization improved, but with persistent z-disc malalignment that likely contributes to the reduced specific force at this time point. Numerous sarcomeric genes



and proteins displayed marked changes in abundance at the 10 and 30 day time points, further suggesting that active myofibril remodeling occurring at these time points that tapers to some extent by 60 days. Genes and proteins involved with protein degradation, such as the E3-ligases MUSA-1, atrogin-1, MuRF-1, and NEDD4, and as the calcium-dependent protease m-calpain (32) were induced at 10 days. In agreement with these findings, the abundance of two important proteins in the 20S catalytic subunit of the 26S proteasome, PSMA6 and PSMB2 (33), were also increased after muscle injury. TGF $\beta$ , which can induce muscle atrophy by activating proteasomal protein degradation (34) was induced after injury, although surprisingly no differences in the closely related genes activin A and B, and a downregulation in myostatin (35), was observed. IL1 $\beta$ , which can promote inflammation and muscle atrophy through activating the NF $\kappa$ B pathway (36), was elevated across all injury time points.

IGF1, which is activated by exercise and can induce muscle hypertrophy through the Akt/p70S6K pathway (32) was upregulated after injury, but interestingly phosphorylation of the IGF1 receptor was reduced 30 and 60 days after rotator cuff tear. In type 2 diabetes, DG and ceramide-induced inflammation, lipotoxicity, and mitochondrial dysfunction are known to activate various serine/threonine kinases that block activation of the insulin receptor (37), which is closely related to the IGF1 receptor. Given the homologies between the two receptors, and the comparable lipotoxic and inflammatory environments, it is possible that similar mechanisms are inhibiting activation of the IGF1 receptor after rotator cuff tear. Phosphorylation of ERK1/2, which is a kinase downstream of IGF1 and several other mechanosensitive pathways in skeletal muscle (38), was also reduced after rotator cuff tear. IGF1 can both activate p70S6K pathway through an Akt/mTOR dependent phosphorylation of the T<sup>389</sup> residue (39), and via ERK1/2 through the T<sup>421</sup>/S<sup>424</sup> residues (40). Although p70S6K phosphorylation was reduced, activation of rpS6 which initiates translation (41) was increased after injury, suggesting an Akt/mTOR and ERK1/2 independent activation of translation in torn rotator cuff muscles. Although p70S6K is a well-known activator of rpS6, numerous other signaling pathways can also phosphorylate rpS6 (42), many of which are associated with cellular stress and inflammation, which is likely also occurring after rotator cuff tear. Although the mechanisms that determine which transcripts are selected for translation by ribosomes are not well understood, p70S6K activation is required for increasing muscle force during growth (43), suggesting a potential role for p70S6K in the translation of myofibrillar mRNAs. In the case of rotator cuff tears, since many patients continue to develop muscle atrophy and have persistent weakness after surgical repair and rehabilitation (7), it is possible that the reason the muscles of these patients fails to recover is due to suppression of the IGF1 signaling pathway that is normally activated in response to exercise.

In addition to muscle atrophy, fibrosis is a common feature of rotator cuff tears (44-46). In the current study, 10 days after injury there was an increase in the levels of the fibroblast marker FSP1, and several proteoglycans including lumican, osteoglycin, periostin, prolargin, thrombospondin 4, and vinculin. However, fibrillar collagens, measured by hydroxyproline levels, did not increase until 30 and 60 days after tear,

corresponding to increases in the expression of several collagen transcripts and other ECM components at the same time points. These findings indicate that pathological changes to muscle fibers occur prior to substantial fibrotic changes in the ECM. As the accumulation of fibrotic ECM impairs lateral force transmission between muscle fibers which increases injury susceptibility during lengthening contractions (47), the changes that occur to the ECM likely further exacerbate weakness following rotator cuff tear.

While myosteatosis has been well documented in various types of muscle injuries and diseases, little is known about the ontogeny of fat accumulation in this condition (5, 6). In the current study, we identified a progressive increase in TG after injury, with TG levels at 60 days that were 3-fold higher than controls. This was consistent with observations of increased lipid accumulation observed in histology and electron microscopy. FFAs were also elevated at 30 and 60 days after rotator cuff tear. There was a downregulation in nearly all of the genes responsible for the transport of FFAs into the muscle cells, and the synthesis of TGs from FFAs (48), including CD36, ACSL1, ACSL6, AGPAT9/GPAT3, GPAM, AGPAT1, AGPAT3, AGPAT6, lipin 1-3, and DGAT1-2. Perilipin 2, which coats lipid droplets and appears to be important for lipid droplet growth and stability (49) was also upregulated after rotator cuff tear, while perilipin 5 which also coats lipid droplets but also helps to target fatty acids to mitochondria for oxidation (49), was downregulated. Consistent with these findings, genes involved with hydrolyzing triglyceride stored in lipid droplets into fatty acids (48, 50) were downregulated after injury, including ATGL and PNPLA3, hormone sensitive lipase, and monoglyceride lipase. These findings suggest that the intrafiber fat that accumulates in myosteatosis does not occur due to increased fatty acid transport into fibers or *de novo* synthesis of fatty acids from other substrates, but likely occurs due to a reduction in lipolysis.

In further support of this notion, mitochondrial lipid oxidation was also reduced 10 days after rotator cuff tear, with a corresponding reduction in the activity of complex I, II, and IV. It can be difficult to precisely measure mitochondrial abundance, especially since mitochondria often exist in large, interconnected networks throughout the muscle fiber (51), but mtDNA abundance and cardiolipin levels are often used to estimate mitochondrial mass (25, 52, 53). While we did not observe a difference in relative levels of mtDNA, a transient decrease in cardiolipins were observed 10 days after rotator cuff tear. Genes involved in the transport of fatty acids into the mitochondria and their conversion into fatty acyl-CoAs (ACSM5, ACSS1, CPT1b, carnitine acylcarnitine translocase, and CPT2), the  $\beta$ -oxidation of fatty acyl Co-As within the mitochondria (ACADS, ACADM, ACADL), and Krebs's Cycle and oxidative phosphorylation genes (citrate synthase, aconitase, isocitrate dehydrogenase, 2-oxoglutarate dehydrogenase, succinyl CoA synthetase, SDHA, fumarase, malate dehydrogenase, NDUFS1, cytochrome C1, COX4, and ATP5G1) (48, 54, 55) were all downregulated after rotator cuff tear, with most remaining so through 60 days after injury. While *in vitro* assays demonstrated a reduction in fatty acid oxidation 10 days after injury, medium and long chain acylcarnitines, which serve as markers for the amount of fatty acids transported into mitochondria (55, 56), were reduced at all post-injury

time points, suggesting a sustained reduction in fatty acid oxidation by mitochondria *in vivo*. Amino acids can be metabolized and eventually oxidized through the formation of short chain acylcarnitines (56), but these were also reduced after muscle injury, indicating that amino acid oxidation is not likely taking the place of lipid oxidation as a source of energy following muscle injury. Although mitochondrial lipid and protein oxidation appear to be reduced, ACOX1, which initiates the oxidation of fatty acids in peroxisomes and (57), and was also upregulated 10 days after rotator cuff tear. Peroxisomal oxidation of lipids also generates reactive oxygen species (57), which likely contribute to the inflammatory environment in muscles after injury.

Mitochondrial lipid oxidation appears reduced after rotator cuff tears, but metabolites involved in glycolysis are enriched 30 and 60 days after injury. Genes involved in glycolytic metabolism, such as phosphofructokinase, aldolase A, GAPDH, phosphoglycerate, and enolase 3 (58), were down at 10 days, but recovered to some extent by 60 days after injury, although glycolytic metabolites remained elevated. The net increase in glycolytic metabolites corresponded with a greater ability of mitochondria to oxidize pyruvate *in vitro*, and these findings in combination with the reduced abundance of acylcarnitines suggest muscle fibers are using much less lipid for oxidation. Further, while there was an accumulation in glycolytic metabolites, no apparent change in myosin isoform expression is present as would be expected with a major fiber type transition occurred. The overall lipid accumulation and shift to a glycolytic phenotype that we observed in this study is similar to the findings in a mouse model of skeletal muscle specific CPT1b deletion, in which mitochondria had a drastically reduced ability to take up long chain fatty acids, resulting in an accumulation of cytosolic lipid droplets, as well as elevated levels of TG and ceramides, and an increase in glycolytic metabolism (59).

Several reports involving animal and human models of skeletal muscle unloading and denervation have identified profound mitochondrial dysfunction and accompanying increases in ROS production that occur subsequent to the injury (60-63). We also observed increased markers of ROS in injured muscles, including elevated levels of glutathionylated proteins, as well as an increase in the abundance of Prdx3 and Prdx6 which scavenge hydrogen peroxide in the mitochondria and cytoplasm, respectively (64, 65). The production of ROS by dysfunctional mitochondria, as suggested by the elevation in Prdx3, likely further exacerbates the inflammatory environment within injured rotator cuff muscle fibers, as elevated ROS has been linked to inhibition of protein synthesis signaling pathways, the induction of proteolytic and autophagic pathways, and fibrosis (66, 67). To address the dysfunctional mitochondria, injured rotator cuff muscle fibers do appear to be activating mitophagy, as evidenced by increased levels of PINK1 and Parkin which target depolarized mitochondria for breakdown in autophagosomes, in a process mediated by ULK1 (68). p62, which plays an important regulatory role in both mitophagy and general autophagy (35), was also markedly elevated at all time points after rotator cuff tear. However, although there appears to be an increase in mitophagy, key genes involved in mitochondrial biogenesis, including PGC1 $\alpha$ , NRF1, and TFAM (69) were downregulated after

injury, as were the mitochondrial fusion genes Mfn1 and Mfn2. We also noted an accumulation of peripheral segment mitochondria in torn rotator cuff muscles.

In the classical two mitochondrial population model, a collection of peripheral mitochondria have decreased oxidative capacity compared to the physically distinct pool of mitochondria in the myofibrillar space (70-72). In the newly emerging view of mitochondria, where mitochondria are thought to exist in a dynamic reticulum extending from the sarcolemma to the myofibrils, and actively undergoing fusion and fission in continuous networks throughout the cell, peripheral segment mitochondria have a greater abundance of proton motive proteins, whereas the connected intermyofibrillar mitochondria located in the I-band have more ATP generating proteins for use by sarcomeres (51, 73). In the current study, the abnormal spherical mitochondria in the peripheral space of injured muscles at 30 and 60 days after rotator cuff tear could reflect a mitochondrial network that has been mechanically and biochemically disrupted, and this is supported from observations in yeast in which the small mitochondria that bud off of larger networks of mitochondria have a spherical appearance (74). While the nature of mitochondrial dysfunction in torn rotator cuff muscles remains unknown, as the continuum of mitochondrial networks that normally exist in healthy skeletal muscle likely requires extensive support from the cytoskeleton of the fiber to maintain shape, we posit that the highly disrupted myofibril architecture that occurs as a result of rotator cuff tear likely interferes with the ability to form a stable intermyofibrillar network, resulting in mitochondrial dysfunction and subsequent lipid accumulation.

There are several limitations to this study. While the rat model is commonly used in the study of rotator cuff pathology, the interfiber fat accumulation phenotype is less pronounced than what is observed in patients with chronic rotator cuff tears. Additionally, humans and large animals of rotator cuff injury develop a combination of inter- and intrafiber lipid accumulation, with the intrafiber accumulation occurring through an expansion of adipocytes. This rat model has virtually no adipocytes that accumulate after injury, which limits our analysis to changes in fat accumulation that occur within muscle fibers. We only evaluated rats with a rotator cuff tear, and did not evaluate changes that occur within the muscle after the tear is repaired. Three post-injury time points were selected to look at subacute, early chronic, and chronic changes in the muscle, but extending the evaluation to early and later time points is likely to add additional information about the pathology. Finally, while only male rats were studied, but we think the results are informative about rotator cuff pathology in both sexes.

Rotator cuff tears are among the most prevalent upper extremity disorders, and can result in profound pain and disability that persist despite surgical repair (7, 9, 75). While surgical techniques have evolved to improve the repair of the torn tendon back to its insertion on the humerus, our ability to treat the extensive muscle atrophy and myosteatosis that occur subsequent to the tear is limited (1, 8). The findings from this study demonstrate that the fat which accumulates in torn rotator cuff muscles likely occurs due to deficits in mitochondrial lipid oxidation, and that the accumulation of fats likely leads to a lipid-induced pro-inflammatory

and lipotoxic state which reduces regeneration. Further exploration of therapies to enhance mitochondrial function and increase lipid oxidation may lead to improvements for patients with rotator cuff tears and other myosteatosis-related conditions.

## **Acknowledgements**

This work was supported by grants F31-AR065931, R01-AR063649, R01-DK107397, R03-DK109888, and U24-DK097153 from the National Institutes of Health. We also acknowledge technical contributions from Dr. Richard McEachin, Dr. James Markworth, and Mr. Jacob Swanson.

## **Author Contributions**

JPG, KF, BM, CLM designed research; JPG, AHQ, PJF, BM, CLM performed research; ANM contributed analytic tools; JPG, AHQ, PJF, KF, BM, CLM analyzed data; JPG and CLM wrote the paper.

# References

1. Mendias, C. L., Roche, S. M., Harning, J. A., Davis, M. E., Lynch, E. B., Sibilsky Enselman, E. R., Jacobson, J. A., Claflin, D. R., Calve, S., and Bedi, A. (2015) Reduced muscle fiber force production and disrupted myofibril architecture in patients with chronic rotator cuff tears. *J Shoulder Elbow Surg* **24**, 111–119
2. Fry, C. S., Johnson, D. L., Ireland, M. L., and Noehren, B. (2017) ACL injury reduces satellite cell abundance and promotes fibrogenic cell expansion within skeletal muscle. *J Orthop Res* **35**, 1876–1885
3. Gibbons, M. C., Singh, A., Anakwenze, O., Cheng, T., Pomerantz, M., Schenk, S., Engler, A. J., and Ward, S. R. (2017) Histological Evidence of Muscle Degeneration in Advanced Human Rotator Cuff Disease. *J Bone Joint Surg Am* **99**, 190–199
4. Carda, S., Cisari, C., and Invernizzi, M. (2013) Sarcopenia or muscle modifications in neurologic diseases: a lexical or pathophysiological difference? *Eur J Phys Rehabil Med* **49**, 119–130
5. Zoico, E., Corzato, F., Bambace, C., Rossi, A. P., Micciolo, R., Cinti, S., Harris, T. B., and Zamboni, M. (2013) Myosteatosis and myofibrosis: relationship with aging, inflammation and insulin resistance. *Archives of Gerontology and Geriatrics* **57**, 411–416
6. Flores, D. V., Mejía Gómez, C., Estrada-Castrillón, M., Smitaman, E., and Pathria, M. N. (2018) MR Imaging of Muscle Trauma: Anatomy, Biomechanics, Pathophysiology, and Imaging Appearance. *Radiographics* **38**, 124–148
7. Gladstone, J. N., Bishop, J. Y., Lo, I. K. Y., and Flatow, E. L. (2007) Fatty infiltration and atrophy of the rotator cuff do not improve after rotator cuff repair and correlate with poor functional outcome. *Am J Sports Med* **35**, 719–728
8. Bedi, A., Dines, J., Warren, R. F., and Dines, D. M. (2010) Massive tears of the rotator cuff. *J Bone Joint Surg Am* **92**, 1894–1908
9. Colvin, A. C., Egorova, N., Harrison, A. K., Moskowitz, A., and Flatow, E. L. (2012) National trends in rotator cuff repair. *J Bone Joint Surg Am* **94**, 227–233
10. Gigliotti, D., Leiter, J. R. S., Macek, B., Davidson, M. J., MacDonald, P. B., and Anderson, J. E. (2015) Atrophy, inducible satellite cell activation, and possible denervation of supraspinatus muscle in injured human rotator-cuff muscle. *AJP - Cell Physiology* **309**, C383–C391
11. Gerber, C., Schneeberger, A. G., Hoppeler, H., and Meyer, D. C. (2007) Correlation of atrophy and fatty infiltration on strength and integrity of rotator cuff repairs: a study in thirteen patients. *J Shoulder Elbow Surg* **16**, 691–696
12. Gumucio, J. P., Davis, M. E., Bradley, J. R., Stafford, P. L., Schiffman, C. J., Lynch, E. B., Claflin, D. R., Bedi, A., and Mendias, C. L. (2012) Rotator cuff tear reduces muscle fiber specific force production and induces macrophage accumulation and autophagy. *J Orthop Res* **30**, 1963–1970
13. Soslowsky, L. J., Carpenter, J. E., DeBano, C. M., Banerji, I., and Moalli, M. R. (1996) Development and use of an animal model for investigations on rotator cuff disease. *J Shoulder Elbow Surg* **5**, 383–392
14. Liu, X., Manzano, G., Kim, H. T., and Feeley, B. T. (2011) A rat model of massive rotator cuff tears. *J Orthop Res* **29**, 588–595
15. Davis, M. E., Stafford, P. L., Jergenson, M. J., Bedi, A., and Mendias, C. L. (2015) Muscle Fibers are Injured at the Time of Acute and Chronic Rotator Cuff Repair. *Clin Orthop Relat Res* **473**, 226–232
16. Sugg, K. B., Korn, M. A., Sarver, D. C., Markworth, J. F., and Mendias, C. L. (2017) Inhibition of platelet-derived growth factor signaling prevents muscle fiber growth during skeletal muscle hypertrophy. *FEBS Lett* **591**, 801–809
17. Mendias, C. L., Schwartz, A. J., Grekin, J. A., Gumucio, J. P., and Sugg, K. B. (2017) Changes in muscle fiber contractility and extracellular matrix production during skeletal muscle hypertrophy. *J Appl Physiol* **122**, 571–579
18. Sarver, D. C., Sugg, K. B., Disser, N. P., Enselman, E. R. S., Awan, T. M., and Mendias, C. L. (2017) Local cryotherapy minimally impacts the metabolome and transcriptome of human skeletal muscle. *Sci Rep* **7**, 2423



19. Afshinnia, F., Rajendiran, T. M., Soni, T., Byun, J., Wernisch, S., Sas, K. M., Hawkins, J., Bellovich, K., Gipson, D., Michailidis, G., Pennathur, S., Michigan Kidney Translational Core CPROBE Investigator Group. (2018) Impaired  $\beta$ -Oxidation and Altered Complex Lipid Fatty Acid Partitioning with Advancing CKD. *J Am Soc Nephrol* **29**, 295–306
20. Kind, T., Liu, K.-H., Lee, D. Y., DeFelice, B., Meissen, J. K., and Fiehn, O. (2013) LipidBlast in silico tandem mass spectrometry database for lipid identification. *Nat. Methods* **10**, 755–758
21. Lorenz, M. A., Burant, C. F., and Kennedy, R. T. (2011) Reducing time and increasing sensitivity in sample preparation for adherent mammalian cell metabolomics. *Anal. Chem.* **83**, 3406–3414
22. Trapnell, C., Roberts, A., Goff, L., Pertea, G., Kim, D., Kelley, D. R., Pimentel, H., Salzberg, S. L., Rinn, J. L., and Pachter, L. (2012) Differential gene and transcript expression analysis of RNA-seq experiments with TopHat and Cufflinks. *Nat Protoc* **7**, 562–578
23. McDonagh, B., Sakellariou, G. K., Smith, N. T., Brownridge, P., and Jackson, M. J. (2014) Differential cysteine labeling and global label-free proteomics reveals an altered metabolic state in skeletal muscle aging. *J. Proteome Res.* **13**, 5008–5021
24. Chong, J., Soufan, O., Li, C., Caraus, I., Li, S., Bourque, G., Wishart, D. S., and Xia, J. (2018) MetaboAnalyst 4.0: towards more transparent and integrative metabolomics analysis. *Nucleic Acids Res* **46**, W486–W494
25. Ajaz, S., Czajka, A., and Malik, A. (2015) Accurate measurement of circulating mitochondrial DNA content from human blood samples using real-time quantitative PCR. *Methods Mol. Biol.* **1264**, 117–131
26. Dohm, G. L., Huston, R. L., Askew, E. W., and Weiser, P. C. (1972) Effects of exercise on activity of heart and muscle mitochondria. *Am J Physiol* **223**, 783–787
27. Jong-Yeon, K., Hickner, R. C., Dohm, G. L., and Houmard, J. A. (2002) Long- and medium-chain fatty acid oxidation is increased in exercise-trained human skeletal muscle. *Metab. Clin. Exp.* **51**, 460–464
28. Baumer, T. G., Chan, D., Mende, V., Dischler, J., Zauel, R., van Holsbeeck, M., Siegal, D. S., Divine, G., Moutzouros, V., and Bey, M. J. (2016) Effects of Rotator Cuff Pathology and Physical Therapy on In Vivo Shoulder Motion and Clinical Outcomes in Patients With a Symptomatic Full-Thickness Rotator Cuff Tear. *Orthop J Sports Med* **4**, 2325967116666506
29. Meyer, G. A., Farris, A. L., Sato, E., Gibbons, M., Lane, J. G., Ward, S. R., and Engler, A. J. (2015) Muscle progenitor cell regenerative capacity in the torn rotator cuff. *J Orthop Res* **33**, 421–429
30. Gibbons, M. C., Sato, E. J., Bachasson, D., Cheng, T., Azimi, H., Schenk, S., Engler, A. J., Singh, A., and Ward, S. R. (2016) Muscle architectural changes after massive human rotator cuff tear. *J Orthop Res* **34**, 2089–2095
31. Valencia, A. P., Lai, J. K., Iyer, S. R., Mistretta, K. L., Spangenburg, E. E., Davis, D. L., Lovering, R. M., and Gilotra, M. N. (2018) Fatty Infiltration Is a Prognostic Marker of Muscle Function After Rotator Cuff Tear. *Am J Sports Med* **46**, 2161–2169
32. Gumucio, J. P., Sugg, K. B., and Mendias, C. L. (2015) TGF- $\beta$  Superfamily Signaling in Muscle and Tendon Adaptation to Resistance Exercise. *Exerc Sport Sci Rev* **43**, 93–99
33. Elenich, L. A., Nandi, D., Kent, A. E., McCluskey, T. S., Cruz, M., Iyer, M. N., Woodward, E. C., Conn, C. W., Ochoa, A. L., Ginsburg, D. B., and Monaco, J. J. (1999) The complete primary structure of mouse 20S proteasomes. *Immunogenetics* **49**, 835–842
34. Mendias, C. L., Gumucio, J. P., Davis, M. E., Bromley, C. W., Davis, C. S., and Brooks, S. V. (2012) Transforming growth factor-beta induces skeletal muscle atrophy and fibrosis through the induction of atrogin-1 and scleraxis. *Muscle Nerve* **45**, 55–59
35. Sartori, R., Gregorevic, P., and Sandri, M. (2014) TGF $\beta$  and BMP signaling in skeletal muscle: potential significance for muscle-related disease. *Trends Endocrinol Metab* **25**, 464–471
36. Yamaki, T., Wu, C.-L., Gustin, M., Lim, J., Jackman, R. W., and Kandarian, S. C. (2012) Rel A/p65 is required for cytokine-induced myotube atrophy. *AJP - Cell Physiology* **303**, C135–C142
37. Boucher, J., Kleinridders, A., and Kahn, C. R. (2014) Insulin receptor signaling in normal and insulin-resistant states. *Cold Spring Harb Perspect Biol* **6**, a009191–a009191

38. West, D. W. D., Baehr, L. M., Marcotte, G. R., Chason, C. M., Tolento, L., Gomes, A. V., Bodine, S. C., and Baar, K. (2016) Acute resistance exercise activates rapamycin-sensitive and -insensitive mechanisms that control translational activity and capacity in skeletal muscle. *J Physiol (Lond)* **594**, 453–468
39. Burnett, P. E., Barrow, R. K., Cohen, N. A., Snyder, S. H., and Sabatini, D. M. (1998) RAFT1 phosphorylation of the translational regulators p70 S6 kinase and 4E-BP1. *Proc Natl Acad Sci USA* **95**, 1432–1437
40. Iijima, Y., Laser, M., Shiraishi, H., Willey, C. D., Sundaravadeivel, B., Xu, L., McDermott, P. J., and Kuppaswamy, D. (2002) c-Raf/MEK/ERK pathway controls protein kinase C-mediated p70S6K activation in adult cardiac muscle cells. *J Biol Chem* **277**, 23065–23075
41. Tavares, M. R., Pavan, I. C. B., Amaral, C. L., Meneguello, L., Luchessi, A. D., and Simabuco, F. M. (2015) The S6K protein family in health and disease. *Life Sci* **131**, 1–10
42. Biever, A., Valjent, E., and Puighermanal, E. (2015) Ribosomal Protein S6 Phosphorylation in the Nervous System: From Regulation to Function. *Front Mol Neurosci* **8**, 75
43. Marabita, M., Baraldo, M., Solagna, F., Ceelen, J. J. M., Sartori, R., Nolte, H., Nemazanyy, I., Pyronnet, S., Kruger, M., Pende, M., and Blaauw, B. (2016) S6K1 Is Required for Increasing Skeletal Muscle Force during Hypertrophy. *Cell Rep* **17**, 501–513
44. Killian, M. L., Lim, C. T., Thomopoulos, S., Charlton, N., Kim, H. M., and Galatz, L. M. (2013) The effect of unloading on gene expression of healthy and injured rotator cuffs. *J Orthop Res* **31**, 1240–1248
45. Wilde, J. M., Gumucio, J. P., Grekin, J. A., Sarver, D. C., Noah, A. C., Ruehlmann, D. G., Davis, M. E., Bedi, A., and Mendias, C. L. (2016) Inhibition of p38 mitogen-activated protein kinase signaling reduces fibrosis and lipid accumulation after rotator cuff repair. *J Shoulder Elbow Surg* **25**, 1501–1508
46. Davis, M. E., Korn, M. A., Gumucio, J. P., Harning, J. A., Saripalli, A. L., Bedi, A., and Mendias, C. L. (2015) Simvastatin reduces fibrosis and protects against muscle weakness after massive rotator cuff tear. *J Shoulder Elbow Surg* **24**, 280–287
47. Zhang, C. and Gao, Y. (2014) Effects of aging on the lateral transmission of force in rat skeletal muscle. *J Biomech* **47**, 944–948
48. Watt, M. J. and Hoy, A. J. (2012) Lipid metabolism in skeletal muscle: generation of adaptive and maladaptive intracellular signals for cellular function. *Am J Physiol Endocrinol Metab* **302**, E1315–E1328
49. MacPherson, R. E. K. and Peters, S. J. (2015) Piecing together the puzzle of perilipin proteins and skeletal muscle lipolysis. *Appl Physiol Nutr Metab* **40**, 641–651
50. Kienesberger, P. C., Oberer, M., Lass, A., and Zechner, R. (2009) Mammalian patatin domain containing proteins: a family with diverse lipolytic activities involved in multiple biological functions. *J. Lipid Res.* **50 Suppl**, S63–S68
51. Glancy, B., Hartnell, L. M., Malide, D., Yu, Z.-X., Combs, C. A., Connelly, P. S., Subramaniam, S., and Balaban, R. S. (2015) Mitochondrial reticulum for cellular energy distribution in muscle. *Nature* **523**, 617–620
52. Menshikova, E. V., Ritov, V. B., Fairfull, L., Ferrell, R. E., Kelley, D. E., and Goodpaster, B. H. (2006) Effects of exercise on mitochondrial content and function in aging human skeletal muscle. *J Gerontol A Biol Sci Med Sci* **61**, 534–540
53. Larsen, S., Nielsen, J., Hansen, C. N., Nielsen, L. B., Wibrand, F., Stride, N., Schroder, H. D., Boushel, R., Helge, J. W., Dela, F., and Hey-Mogensen, M. (2012) Biomarkers of mitochondrial content in skeletal muscle of healthy young human subjects. *J Physiol (Lond)* **590**, 3349–3360
54. Carter, H. N., Chen, C. C. W., and Hood, D. A. (2015) Mitochondria, muscle health, and exercise with advancing age. *Physiology (Bethesda, Md)* **30**, 208–223
55. Aon, M. A., Bhatt, N., and Cortassa, S. C. (2014) Mitochondrial and cellular mechanisms for managing lipid excess. *Front Physiol* **5**, 282
56. Overmyer, K. A., Evans, C. R., Qi, N. R., Minogue, C. E., Carson, J. J., Chermide-Scabbo, C. J., Koch, L. G., Britton, S. L., Pagliarini, D. J., Coon, J. J., and Burant, C. F. (2015) Maximal oxidative capacity during exercise is associated with skeletal muscle fuel selection and dynamic changes in mitochondrial protein acetylation. *Cell Metab.* **21**, 468–478

57. Zeng, J. and Li, D. (2004) Expression and purification of his-tagged rat peroxisomal acyl-CoA oxidase I wild-type and E421 mutant proteins. *Protein Expr Purif* **38**, 153–160
58. Demine, S., Reddy, N., Renard, P., Raes, M., and Arnould, T. (2014) Unraveling biochemical pathways affected by mitochondrial dysfunctions using metabolomic approaches. *Metabolites* **4**, 831–878
59. Wicks, S. E., Vandanmagsar, B., Haynie, K. R., Fuller, S. E., Warfel, J. D., Stephens, J. M., Wang, M., Han, X., Zhang, J., Noland, R. C., and Mynatt, R. L. (2015) Impaired mitochondrial fat oxidation induces adaptive remodeling of muscle metabolism. *Proc Natl Acad Sci USA* **112**, E3300–E3309
60. Gram, M., Vigelsø, A., Yokota, T., Helge, J. W., Dela, F., and Hey-Mogensen, M. (2015) Skeletal muscle mitochondrial H<sub>2</sub>O<sub>2</sub> emission increases with immobilization and decreases after aerobic training in young and older men. *J Physiol (Lond)* **593**, 4011–4027
61. Bhattacharya, A., Muller, F. L., Liu, Y., Sabia, M., Liang, H., Song, W., Jang, Y. C., Ran, Q., and Van Remmen, H. (2009) Denervation induces cytosolic phospholipase A<sub>2</sub>-mediated fatty acid hydroperoxide generation by muscle mitochondria. *J Biol Chem* **284**, 46–55
62. Bhattacharya, A., Lustgarten, M., Shi, Y., Liu, Y., Jang, Y. C., Pulliam, D., Jernigan, A. L., and Van Remmen, H. (2011) Increased mitochondrial matrix-directed superoxide production by fatty acid hydroperoxides in skeletal muscle mitochondria. *Free Radic. Biol. Med.* **50**, 592–601
63. Pollock, N., Staunton, C. A., Vasilaki, A., McArdle, A., and Jackson, M. J. (2017) Denervated muscle fibers induce mitochondrial peroxide generation in neighboring innervated fibers: Role in muscle aging. *Free Radic. Biol. Med.* **112**, 84–92
64. Ma, S., Zhang, X., Zheng, L., Li, Z., Zhao, X., Lai, W., Shen, H., Lv, J., Yang, G., Wang, Q., and Ji, J. (2016) Peroxiredoxin 6 Is a Crucial Factor in the Initial Step of Mitochondrial Clearance and Is Upstream of the PINK1-Parkin Pathway. *Antioxid. Redox Signal.* **24**, 486–501
65. Watabe, S., Hiroi, T., Yamamoto, Y., Fujioka, Y., Hasegawa, H., Yago, N., and Takahashi, S. Y. (1997) SP-22 is a thioredoxin-dependent peroxide reductase in mitochondria. *Eur. J. Biochem.* **249**, 52–60
66. Powers, S. K., Morton, A. B., Ahn, B., and Smuder, A. J. (2016) Redox control of skeletal muscle atrophy. *Free Radic. Biol. Med.* **98**, 208–217
67. Richter, K. and Kietzmann, T. (2016) Reactive oxygen species and fibrosis: further evidence of a significant liaison. *Cell Tissue Res* **365**, 591–605
68. Drake, J. C. and Yan, Z. (2017) Mitophagy in maintaining skeletal muscle mitochondrial proteostasis and metabolic health with ageing. *J Physiol (Lond)* **595**, 6391–6399
69. Tryon, L. D., Vainshtein, A., Memme, J. M., Crilly, M. J., and Hood, D. A. (2014) Recent advances in mitochondrial turnover during chronic muscle disuse. *Integr Med Res* **3**, 161–171
70. Cogswell, A. M., Stevens, R. J., and Hood, D. A. (1993) Properties of skeletal muscle mitochondria isolated from subsarcolemmal and intermyofibrillar regions. *Am J Physiol* **264**, C383–C389
71. Ferreira, R., Vitorino, R., Alves, R. M. P., Appell, H. J., Powers, S. K., Duarte, J. A., and Amado, F. (2010) Subsarcolemmal and intermyofibrillar mitochondria proteome differences disclose functional specializations in skeletal muscle. *Proteomics* **10**, 3142–3154
72. Koves, T. R., Noland, R. C., Bates, A. L., Henes, S. T., Muoio, D. M., and Cortright, R. N. (2005) Subsarcolemmal and intermyofibrillar mitochondria play distinct roles in regulating skeletal muscle fatty acid metabolism. *Am J Physiol, Cell Physiol* **288**, C1074–C1082
73. Patel, K. D., Glancy, B., and Balaban, R. S. (2016) The electrochemical transmission in I-Band segments of the mitochondrial reticulum. *Biochim Biophys Acta* **1857**, 1284–1289
74. Mears, J. A., Lackner, L. L., Fang, S., Ingerman, E., Nunnari, J., and Hinshaw, J. E. (2011) Conformational changes in Dnm1 support a contractile mechanism for mitochondrial fission. *Nat. Struct. Mol. Biol.* **18**, 20–26
75. Yamaguchi, K., Ditsios, K., Middleton, W. D., Hildebolt, C. F., Galatz, L. M., and Teefey, S. A. (2006) The demographic and morphological features of rotator cuff disease. A comparison of asymptomatic and symptomatic shoulders. *J Bone Joint Surg Am* **88**, 1699–1704



## Figure Legends

**Figure 1. Changes in muscle mass, fiber size, collagen content, and lipid accumulation after rotator cuff tear.** (A) Mass, (B) muscle fiber histology cross-sectional area (CSA) values, and (C) hydroxyproline content of muscles following rotator cuff tear. (D) Representative histology of areas of muscle demonstrating lipid accumulation, with neutral lipids in green, extracellular matrix in red, and nuclei in blue. Data are presented mean+SD,  $N \geq 6$  muscles per group. Post-hoc sorting ( $P < 0.05$ ): a, different from 0d; b, different from 10d; c, different from 30d.

**Figure 2. Changes in myofibrillar architecture and muscle fiber contractility after rotator cuff tear.** (A) Representative electron micrographs taken in the middle of the fiber demonstrating disrupted sarcomere ultrastructure in supraspinatus muscles following injury. Arrowheads indicate lipid-laden mitochondria. (B) Cross-sectional area (CSA), (C) maximum isometric force ( $F_0$ ), and (D) specific force ( $sF_0$ ) of permeabilized muscle fibers from control and injured muscles.  $N = 10$  muscles per group. Post-hoc sorting ( $P < 0.05$ ): a, different from 0d; b, different from 10d; c, different from 30d.

**Figure 3. Changes in IGF1 signaling after rotator cuff tear.** Quantification of band densitometry of (A) p-IGF1R Y<sup>1135</sup>, (B) p-ERK1/2 T<sup>202</sup>/Y<sup>204</sup>, (C) p-Akt S<sup>473</sup>, (D) p-p70S6K T<sup>389</sup>, (E) p-p70S6K T<sup>421</sup>/S<sup>424</sup>, (F) p-rpS6 S<sup>235</sup>/S<sup>236</sup>, normalized to total protein, following rotator cuff tear. (G) Representative phospho and total protein Western blots, with a Coomassie stained membrane as a loading control. Data are presented mean+SD,  $N = 6$  per group. Post-hoc sorting ( $P < 0.05$ ): a, different from 0d; b, different from 10d; c, different from 30d.

**Figure 4. Changes in lipid species after rotator cuff tear.** (A) Principal component analysis of groups C-R. Levels of (B) free fatty acids (FFA), (C) triglycerides (TG), (D) diglycerides (DG), (E) monoglycerides (MG), (F) cholesterol ester (CE), (G) ceramide phosphates (CerP), (H) sphingomyelins (SM), (I) phosphatidic acids (PA), (J) phosphatidylglycerols (PG), (K) phosphatidylinositols (PI), (L) phosphatidylserines (PS), (M) phosphatidylcholines (PC), (N) phosphatidylethanolamines (PE), (O) lysophosphatidylcholines (LysoPC), (P) lysophosphatidylethanolamines (LysoPE), (Q) plasmeyl phosphatidylcholines (Plasmeyl PC), and (R) plasmeyl phosphatidylethanolamines (Plasmeyl PE), as measured by mass spectrometry and presented as relative peak intensity (RPI). Data are presented mean+SD,  $N = 10$  muscles per group for A and C-R, and  $N = 5$  muscles per group for B. Post-hoc sorting ( $P < 0.05$ ): a, different from 0d; b, different from 10d; c, different from 30d.

**Figure 5. Changes in metabolites after rotator cuff tear.** (A) Principal component analysis of groups. Baseline normalized heatmaps demonstrating levels of selected (B) nucleotide and nucleoside metabolites, (C) creatine and phosphocreatine, (D) glycolysis and pentose phosphate metabolites, (E) free amino acids, (F) Krebs cycle metabolites, and (G) oxidized and reduced glutathione, as measured by mass spectrometry.  $N = 5$  muscles per group. Post-hoc sorting ( $P < 0.05$ ): a, different from 0d; b, different from 10d; c, different from 30d.



**Figure 6. Changes in the transcriptome after rotator cuff tear.** (A) Principal component analysis of overall changes across the transcriptome. (B) P-values of selected biological pathways and functions identified from Ingenuity Pathway Analysis. Levels of selected (C) contractile and structural genes, (D) autophagy and atrophy genes, (E) growth factors and cytokines, (F) extracellular matrix genes, (G) glycolysis genes, (H) lipid storage and mobilization genes, (I) mitochondrial and oxidative metabolism genes, (J) reactive oxygen species and peroxisomal oxidation genes, as measured by RNA-seq. N=4 muscles per group. Post-hoc sorting ( $P < 0.05$ ): a, different from 0d; b, different from 10d; c, different from 30d.

**Figure 7. Changes in the proteome after rotator cuff tear.** (A) Principal component analysis of overall changes across the proteome. Levels of selected (B) protein synthesis and atrophy proteins, (C) contractile and structural proteins, (D) extracellular matrix proteins, (E) metabolic proteins, and (F) reactive oxygen species proteins, as measured by mass spectrometry. N=4 muscles per group. Post-hoc sorting ( $P < 0.05$ ): a, different from 0d; b, different from 10d; c, different from 30d.

**Figure 8. Changes in mitochondria abundance and function after rotator cuff tear.** (A) Representative electron micrographs taken at the sarcolemma, with arrowheads demonstrating accumulation of peripheral, subsarcolemmal mitochondria. (B) Copies of mitochondrial DNA abundance to genomic DNA abundance. (C) Short chain ( $\leq 5$  carbon) acylcarnitines, (D) Medium chain (6-12 carbon) acylcarnitines, (E) Long chain (13-20 carbon) acylcarnitines, (F) L-carnitine, and (G) Cardiolipins, as measured by mass spectrometry and presented as relative peak intensity (RPI). Quantification of Western blot band densitometry of (H) glutathionylated proteins, (I) PINK1, (J) Parkin, (K) Ulk1, (L) p62, (M) Prdx3, (N) Prdx6, (O) SDHA and (P) COXIV protein levels, with representative blots shown as insets. Enzymatic activity of (Q) Complex I, (R) Complex II, and (S) Complex IV. Oxidation rates of (T)  $^{14}\text{C}$ -pyruvate and (U)  $^{14}\text{C}$ -palmitate. Data are presented mean+SD, N=6 muscles per group for B, N=5 muscles per group for C-F, N=10 muscles per group for G, N=3 muscles per group for H-P, N=4-6 muscles per group for Q-U. Post-hoc sorting ( $P < 0.05$ ): a, different from 0d; b, different from 10d; c, different from 30d.

**Figure 9. Overview of pathological changes after rotator cuff tear.** An overview of the pathological changes observed and proposed that contribute to myosteatosis, weakness, and fibrosis after rotator cuff tear.

**A**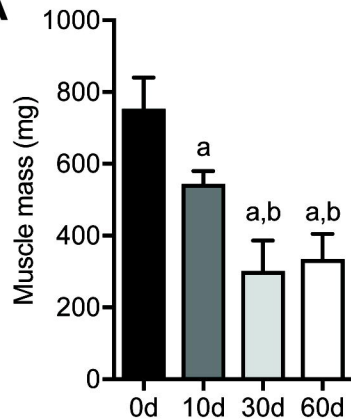**B**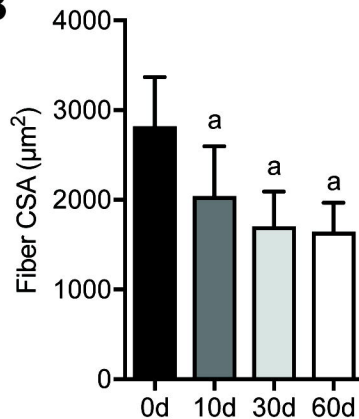**C**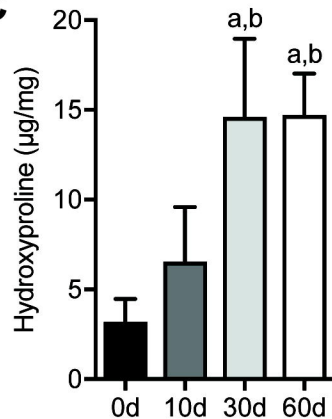

a, different ( $P < 0.05$ ) from 0d    b, different ( $P < 0.05$ ) from 10d    c, different ( $P < 0.05$ ) from 30d

**D**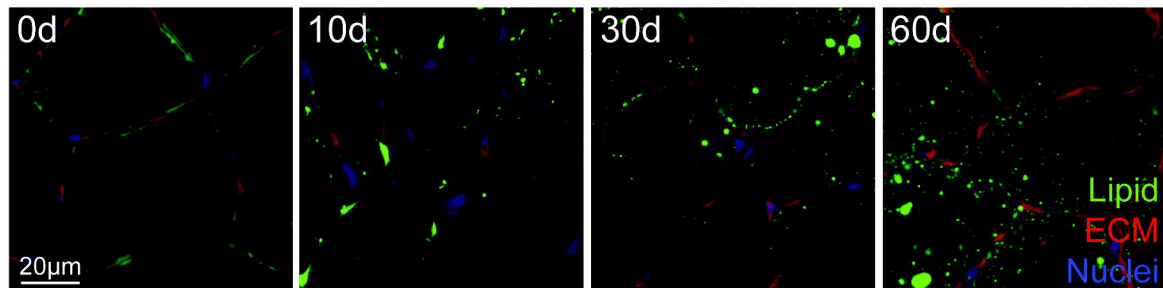



**A**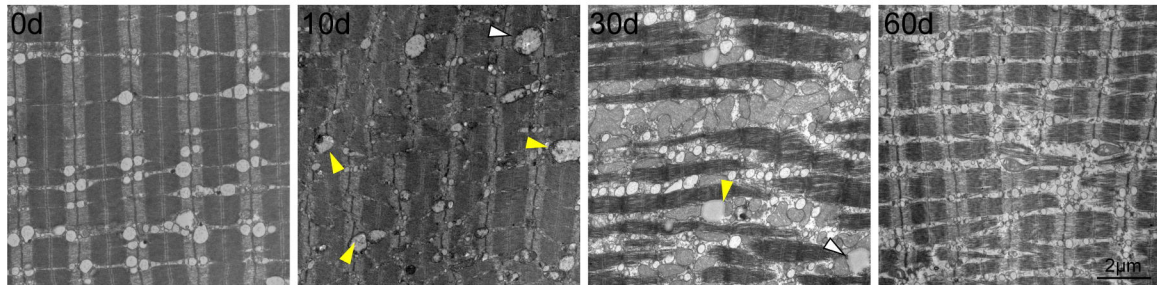**B**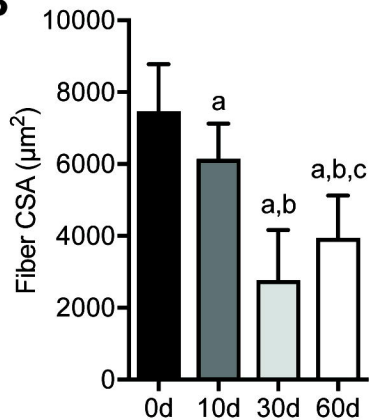**C**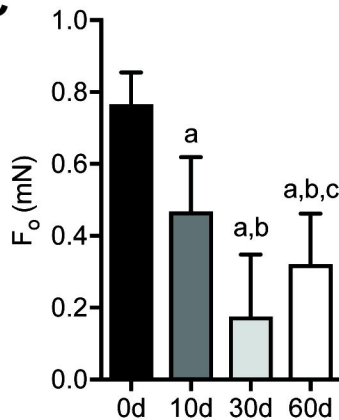**D**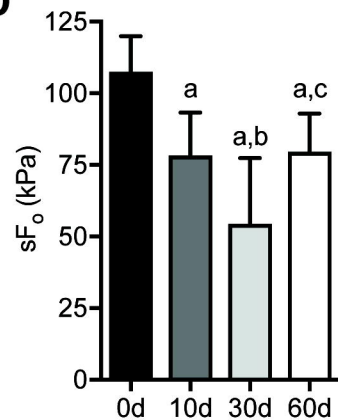a, different ( $P < 0.05$ ) from 0db, different ( $P < 0.05$ ) from 10dc, different ( $P < 0.05$ ) from 30d

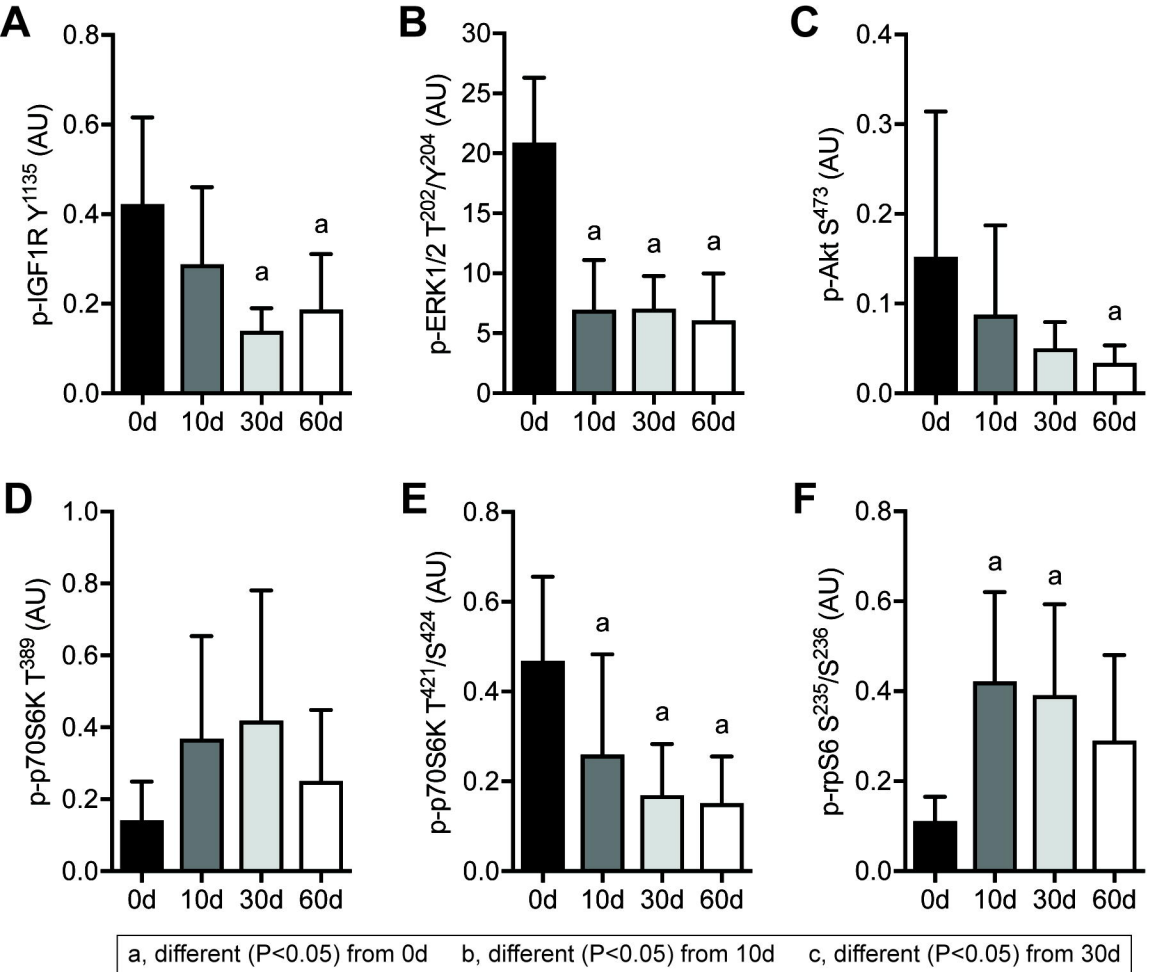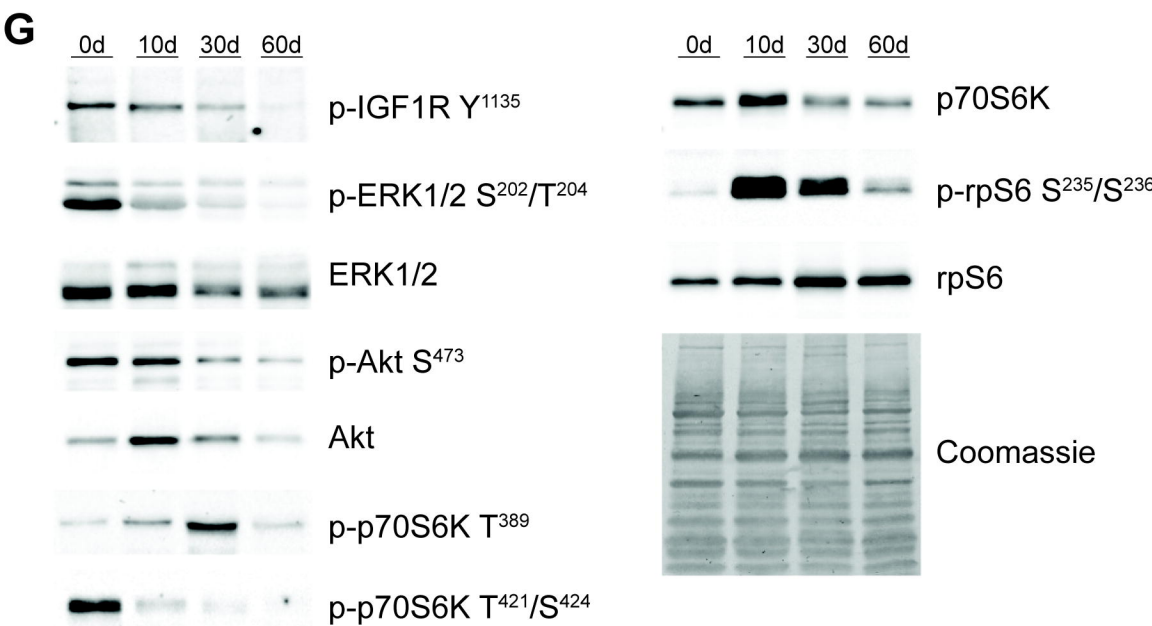

**A**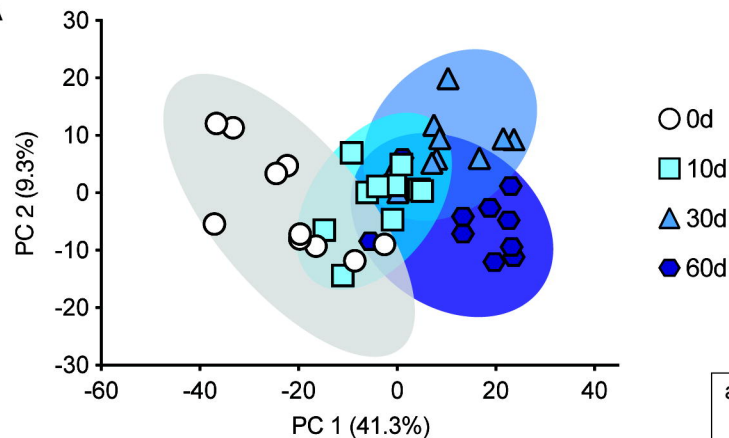**B**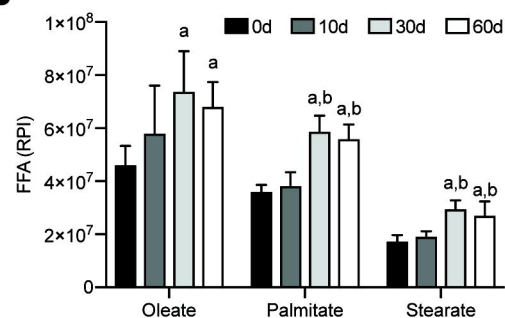

a, different ( $P < 0.05$ ) from 0d    b, different ( $P < 0.05$ ) from 10d  
c, different ( $P < 0.05$ ) from 30d

**C**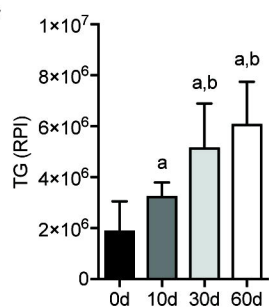**D**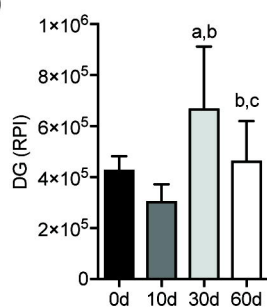**E**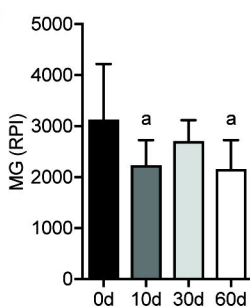**F**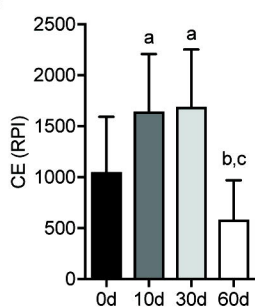**G**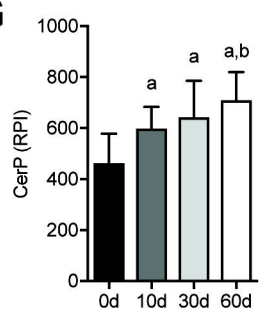**H**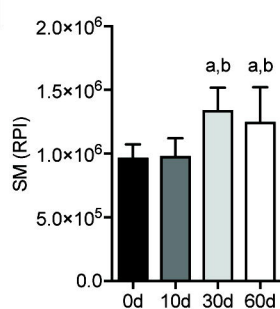**I**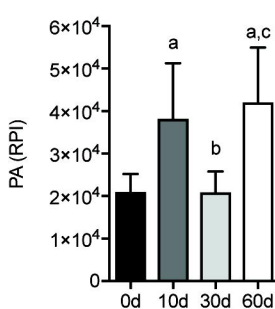**J**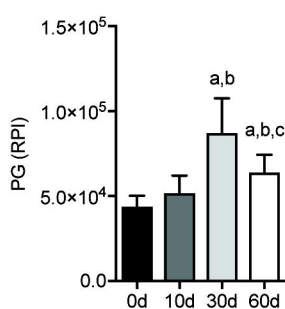**K**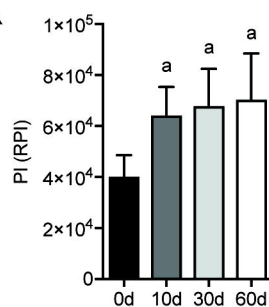**L**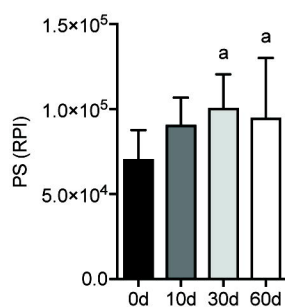**M**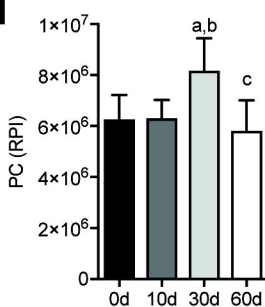**N**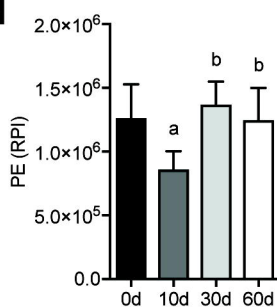**O**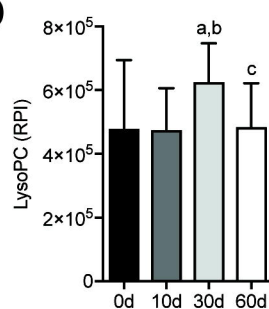**P**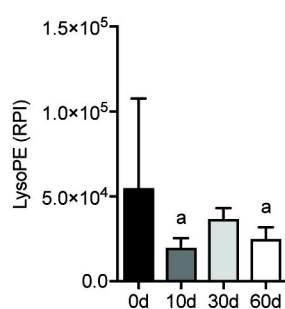**Q**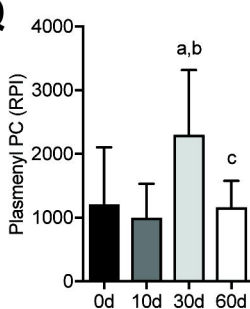**R**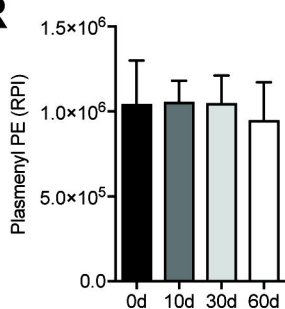

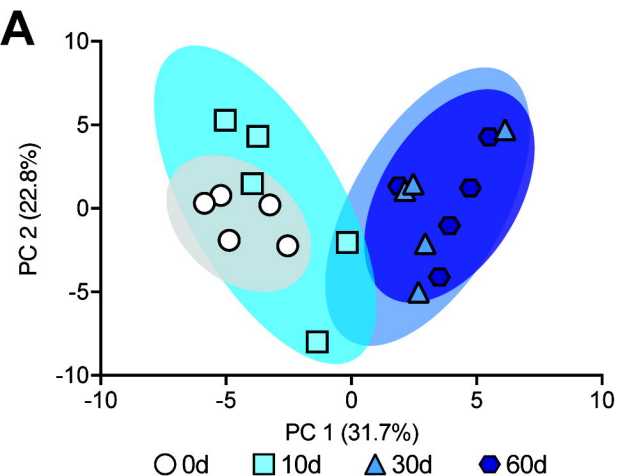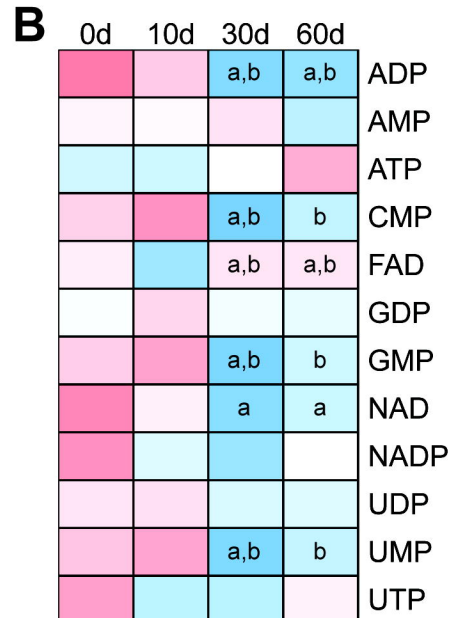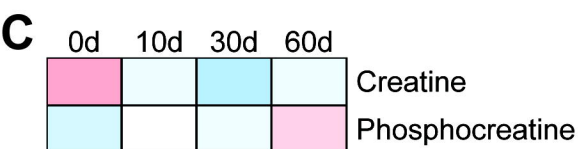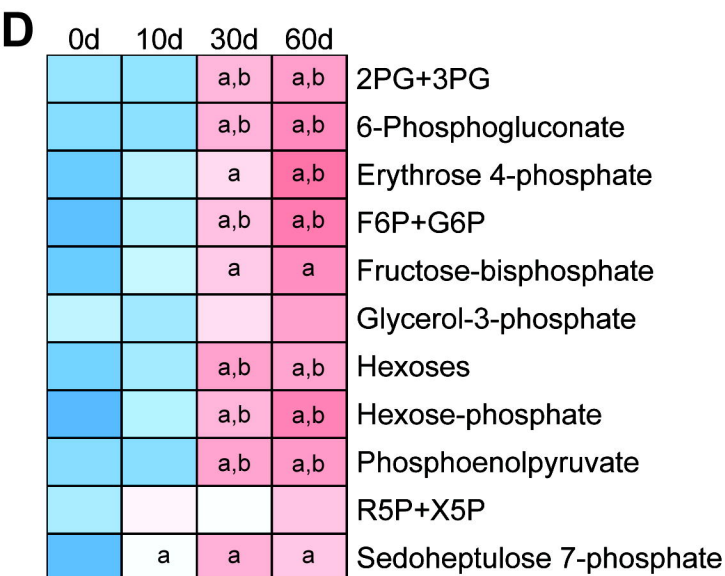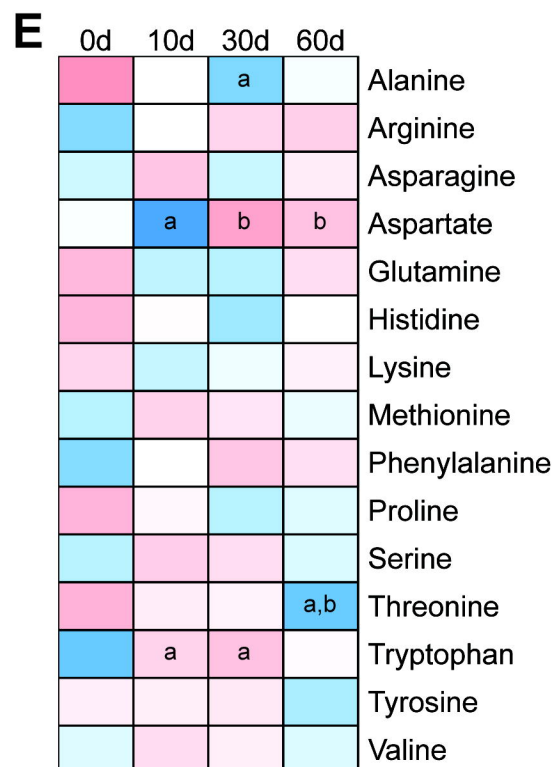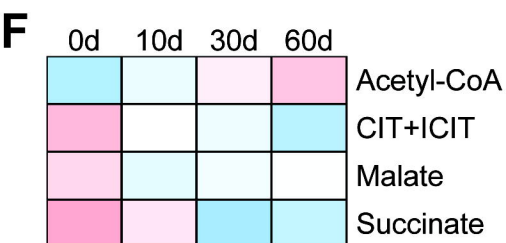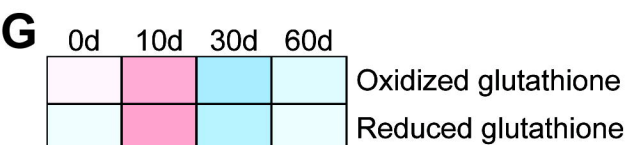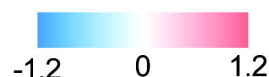

a, different ( $P < 0.05$ ) from 0d  
b, different ( $P < 0.05$ ) from 10d  
c, different ( $P < 0.05$ ) from 30d

**A**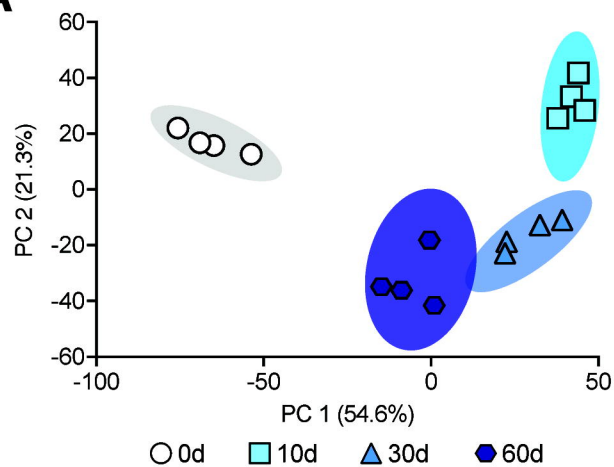**B**

| Pathway/Function             | P-value<br>0d vs 10d | P-value<br>0d vs 30d | P-value<br>0d vs 60d |
|------------------------------|----------------------|----------------------|----------------------|
| Oxidation of fatty acid      | 1.14E-05             | 1.43E-04             | 3.13E-04             |
| Concentration of lipid       | 1.00E-04             | 1.26E-04             | 6.14E-05             |
| Accumulation of fatty acid   | 3.78E-05             | 3.33E-04             | 6.03E-04             |
| Synthesis of lipid           | 3.62E-04             | 4.57E-06             | 1.16E-09             |
| Disorder of lipid metabolism | 8.00E-09             | 5.42E-04             | --                   |
| Mitochondrial dysfunction    | 1.06E-23             | --                   | --                   |
| Metabolism of carbohydrate   | --                   | 6.65E-05             | 2.79E-06             |
| Production of ROS            | 7.21E-11             | 7.06E-07             | 2.55E-07             |
| Muscle contraction           | 5.99E-14             | 1.53E-05             | 2.41E-05             |
| Growth of connective tissue  | 3.18E-04             | 1.04E-04             | 1.78E-07             |
| Inflammatory response        | 4.89E-07             | 5.66E-08             | 4.97E-13             |

**F**

| 0d | 10d | 30d | 60d   |         |
|----|-----|-----|-------|---------|
|    | a   | a   | a     | Col1a1  |
|    | a   | a   | a     | Col3a1  |
|    | a   | b   | a,b   | Col4a1  |
|    |     | a,b | a,b   | Col6a2  |
|    |     | a,b | a,b   | Col14a1 |
|    |     | a,b | a,b   | ElN     |
|    | a   | a   | a     | Lum     |
|    | a   | a   | a     | Mmp2    |
|    | a   | a   | a     | Mmp14   |
|    | a   | a,b | a,b,c | S100a4  |
|    | a   | a,b | a,b,c | Scx     |
|    | a   | a,b | a,b   | Thbs4   |
|    | a   | a   | a     | Timp1   |
|    | a   | a,b | a,c   | Timp2   |
|    | a   | a   |       | Tnc     |
|    | a   | a   | a     | Tnmd    |
|    | a   | b   | b     | Vcl     |

**C**

| 0d | 10d | 30d | 60d   |        |
|----|-----|-----|-------|--------|
|    | a   | a,b | a,b   | Des    |
|    | a   | a,b | b,c   | Dysf   |
|    | a   | a,b | a,b   | Msn    |
|    | a   | a,b | a,b,c | Mybpc1 |
|    | a   | a,b | a,b,c | Mybpc2 |
|    | a   | a,b | a,b   | Myh1   |
|    | a   | b   | a,b,c | Myh2   |
|    | a   | a,b | a,b   | Myh3   |
|    | a   | a   | a,b,c | Myh4   |
|    | a   | a,b | b     | Myh7   |
|    | a   | b   | a,c   | Myh8   |
|    | a   | b   | a,b   | Myl1   |
|    | a   | b   | b     | Mypn   |
|    | a   | a,b | b,c   | Tnni2  |

**G**

| 0d | 10d | 30d | 60d   |       |
|----|-----|-----|-------|-------|
|    | a   | a   | a,b,c | Aldoa |
|    | a   | a,b | a,b,c | Eno3  |
|    | a   | a,b | b,c   | Fbp2  |
|    | a   | a,b | a,b,c | Gapdh |
|    | a   | a,b | a,b,c | Gpi   |
|    |     | a,b | a,b   | Hk2   |
|    | a   | a,b | a,b,c | Pfkm  |
|    | a   | a,b | b     | Pgam2 |
|    | a   | a,b | a,b,c | Pgk1  |
|    | a   | a,b | a,b,c | Pkm   |
|    | a   | a,b | a,b,c | Pygm  |

**J**

| 0d | 10d | 30d | 60d   |        |
|----|-----|-----|-------|--------|
|    | a   | b   | b     | Acox1  |
|    | a   | b   | b     | Cat    |
|    | a   | b   |       | Cyp4b1 |
|    | a   |     | a,b,c | Gpx1   |
|    | a   | a   | a     | Gpx3   |
|    |     |     | a,b,c | Prdx1  |
|    |     |     | a,b,c | Sod1   |
|    | a   | a,b | a,b   | Txn1   |

**D**

| 0d | 10d | 30d | 60d   |        |
|----|-----|-----|-------|--------|
|    | a   | b   | a,b   | Becn1  |
|    | a   | a,b | a,b   | Capn2  |
|    | a   | a   | a,b,c | Fbxo30 |
|    | a   | a,b | a,b   | Fbxo32 |
|    | a   | a   | a     | Mustn1 |
|    | a   | a,b | b,c   | Nedd4  |
|    | a   | a   | b,c   | Psma6  |
|    | a   |     | a,c   | Psmb2  |
|    | a   |     | b     | Trim63 |

**H**

| 0d | 10d | 30d | 60d   |        |
|----|-----|-----|-------|--------|
|    | a   | a   | a     | Acs1   |
|    | a   | a,b | a,b   | Acs16  |
|    | a   | a,b | a,b,c | Agpat1 |
|    | a   | a,b | a,c   | Agpat3 |
|    | a   | b   | a,b,c | Agpat6 |
|    | a   | a,b | b,c   | Agpat9 |
|    | a   | a,b | a,b   | Apoe   |
|    | a   | a,b | a,b,c | Cd36   |
|    | a   | a   | a     | Dgat1  |
|    | a   | a   | a,c   | Dgat2  |
|    | a   | b   | b,c   | Fabp4  |
|    | a   | a,b | a,c   | Fasn   |
|    | a   | a,b | a,b   | Gpam   |
|    | a   | a   | b,c   | Lipe   |
|    | a   | a,b | a,b   | Lpin1  |
|    | a   | a   | a,b,c | Lpin2  |
|    | a   | a,b | a,b   | Lpin3  |
|    | a   | a   | c     | Lpl    |
|    |     | a,b | a,b   | Mgl1   |
|    | a   | a,b | a,c   | Plin2  |
|    | a   | b   |       | Plin5  |
|    | a   | a,b | a,b,c | Pnpla3 |
|    |     | a,b | a,b   | Pnpla7 |

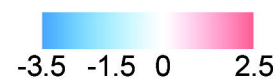

a, different (P<0.05) from 0d  
b, different (P<0.05) from 10d  
c, different (P<0.05) from 30d

**E**

| 0d | 10d | 30d | 60d |       |
|----|-----|-----|-----|-------|
|    |     | a,b | b   | Bmp7  |
|    | a   | a   | b   | Gdf11 |
|    | a   | a,b | a,b | Igf1  |
|    | a   | a   | a   | Il1b  |
|    | a   | a   | a   | Il23a |
|    | a   | a   | a   | Il6   |
|    |     |     |     | Inhba |
|    |     |     |     | Inhbb |
|    | a   | a   | a,b | Mstn  |
|    | a   | a   | a,b | Pdgfb |
|    | a   | a,b | a,c | Tgfb1 |

**I**

| 0d | 10d | 30d | 60d   |          |
|----|-----|-----|-------|----------|
|    | a   | b   | b     | Acadl    |
|    | a   | a,b | a,b,c | Acadm    |
|    | a   | a,b | a,b   | Acads    |
|    | a   | a,b | a,b,c | Aco2     |
|    | a   | a,b | a,b,c | Acsm5    |
|    | a   | a,b | b,c   | Acss1    |
|    | a   | a,b | b     | Atp5g1   |
|    | a   | b   | a,b,c | Cox4i1   |
|    | a   | a   | b     | Cpt1b    |
|    | a   | a,b | a,b   | Cpt2     |
|    | a   | a   | a     | Cs       |
|    | a   | b   | b     | Cyc1     |
|    | a   | a,b | b,c   | Fh       |
|    | a   | b   | b     | Idh2     |
|    | a   | a,b | b,c   | Mdh2     |
|    | a   | a,b | a     | Mfn1     |
|    | a   | a   | a     | Mfn2     |
|    | a   | a,b | a,b,c | Ndufs1   |
|    | a   | a   | a,b   | Nfe2l2   |
|    | a   | a   | a     | Nrf1     |
|    | a   | a   | a     | Ogdh     |
|    | a   | a,b | a,b   | Ppargc1a |
|    | a   | a,b | a,b,c | Sdha     |
|    | a   | b   | b     | Slc25a20 |
|    | a   | a,b | b     | Suc1g1   |
|    |     | a,b | a,b   | Tfam     |
|    | a   | a   | b,c   | Tom1     |



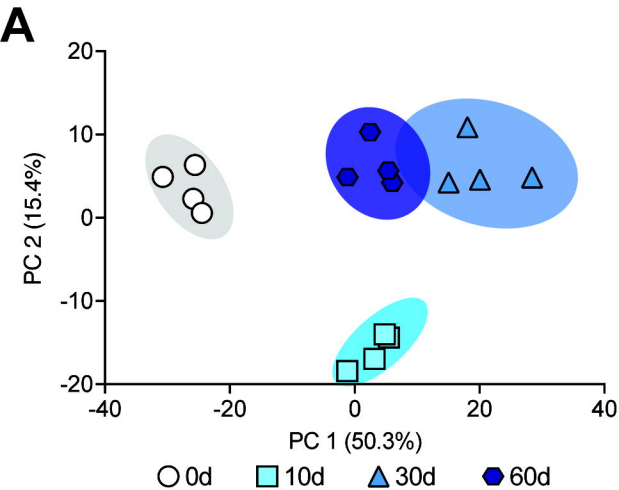

**B**

| 0d | 10d | 30d | 60d   |             |
|----|-----|-----|-------|-------------|
|    | a   | a   | a     | Cathepsin B |
|    | a   | a   | b,c   | EEF1A2      |
|    | a   | a   | a,c   | EEF1B2      |
|    | a   | a   | b,c   | EIF4A2      |
|    | a   | a   | a,b,c | EIF5A       |
|    | a   | a   | a     | m-Calpain   |
|    | a   | a,b | a,b   | MUSTN1      |
|    | a   | a   |       | NEDD4       |
|    | a   | a   | a,b   | PSMA6       |
|    | a   | a   | a,b   | PSMB2       |
|    | a   | a,b | c     | rpSA        |

**C**

| 0d | 10d | 30d | 60d   |             |
|----|-----|-----|-------|-------------|
|    | a   | a,b | b,c   | Desmin      |
|    | a   | a,b | a,c   | Moesin      |
|    |     |     | a,b,c | MYBPC1      |
|    |     |     | a,b   | MYBPC2      |
|    | a   | a,b | b     | MLC1        |
|    |     | a,b | a,b   | Myopalladin |
|    |     | a   | a,b   | TNNI2       |

**D**

| 0d | 10d | 30d | 60d |             |
|----|-----|-----|-----|-------------|
|    | a   | a,b | a,c | FSP1        |
|    | a   | a,b | a,c | Lumican     |
|    | a   | a   | a   | Osteoglycin |
|    | a   | a,b | a,c | Periostin   |
|    | a   | a,b | a,c | Prolargin   |
|    | a   | a   |     | TSP4        |
|    | a   | a,b | a,c | Vinculin    |

**E**

| 0d | 10d | 30d | 60d   |                    |
|----|-----|-----|-------|--------------------|
|    |     | a,b | b     | ACADL              |
|    | a   | b   | b     | ACADS              |
|    | a   | b   | b     | ACO2               |
|    | a   | a,b | a,c   | ApoE               |
|    | a   | a,b | a,b   | FABP4              |
|    |     | a,b | a,b   | HSPA9              |
|    | a   |     | b,c   | MDH2               |
|    | a   | a,b | a,b,c | Glyc Phosphorylase |
|    | a   | b   | b     | SDHA               |
|    | a   | a   | a,b,c | TOM1               |

**F**

| 0d | 10d | 30d | 60d   |             |
|----|-----|-----|-------|-------------|
|    | a   | a   | a     | Catalase    |
|    | a   | a,b | a     | GPX1        |
|    | a   | a,b | a,c   | GPX3        |
|    | a   | a   | a     | PRDX1       |
|    |     | a,b | c     | PRDX2       |
|    |     | a,b | a,b   | PRDX3       |
|    | a   | a   | b,c   | SOD1        |
|    | a   | a   | a,b,c | Thioredoxin |

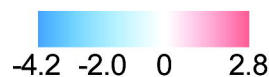

a, different ( $P < 0.05$ ) from 0d  
b, different ( $P < 0.05$ ) from 10d  
c, different ( $P < 0.05$ ) from 30d

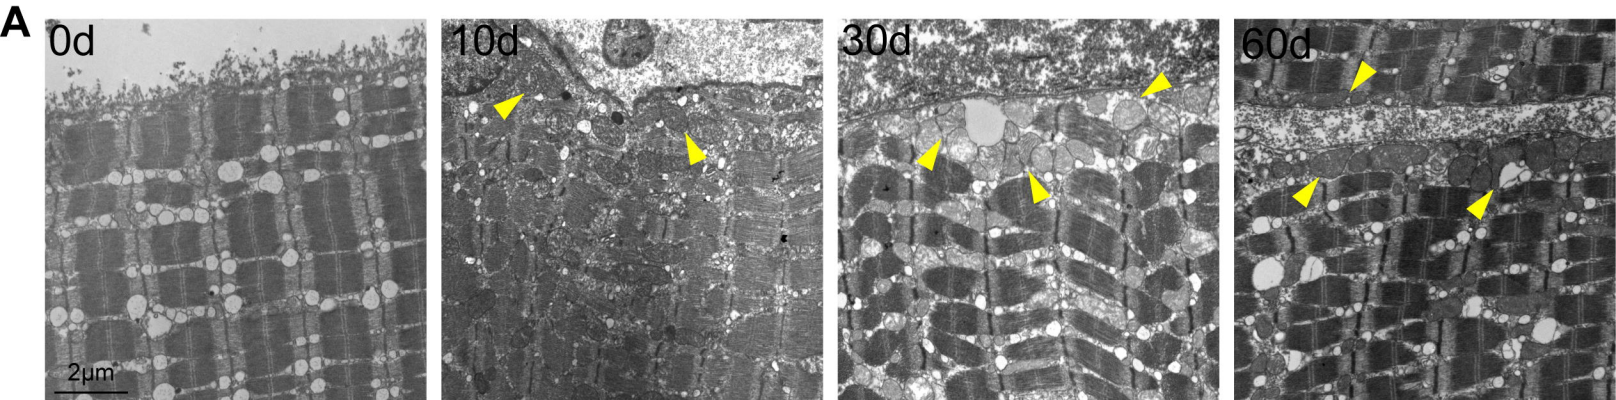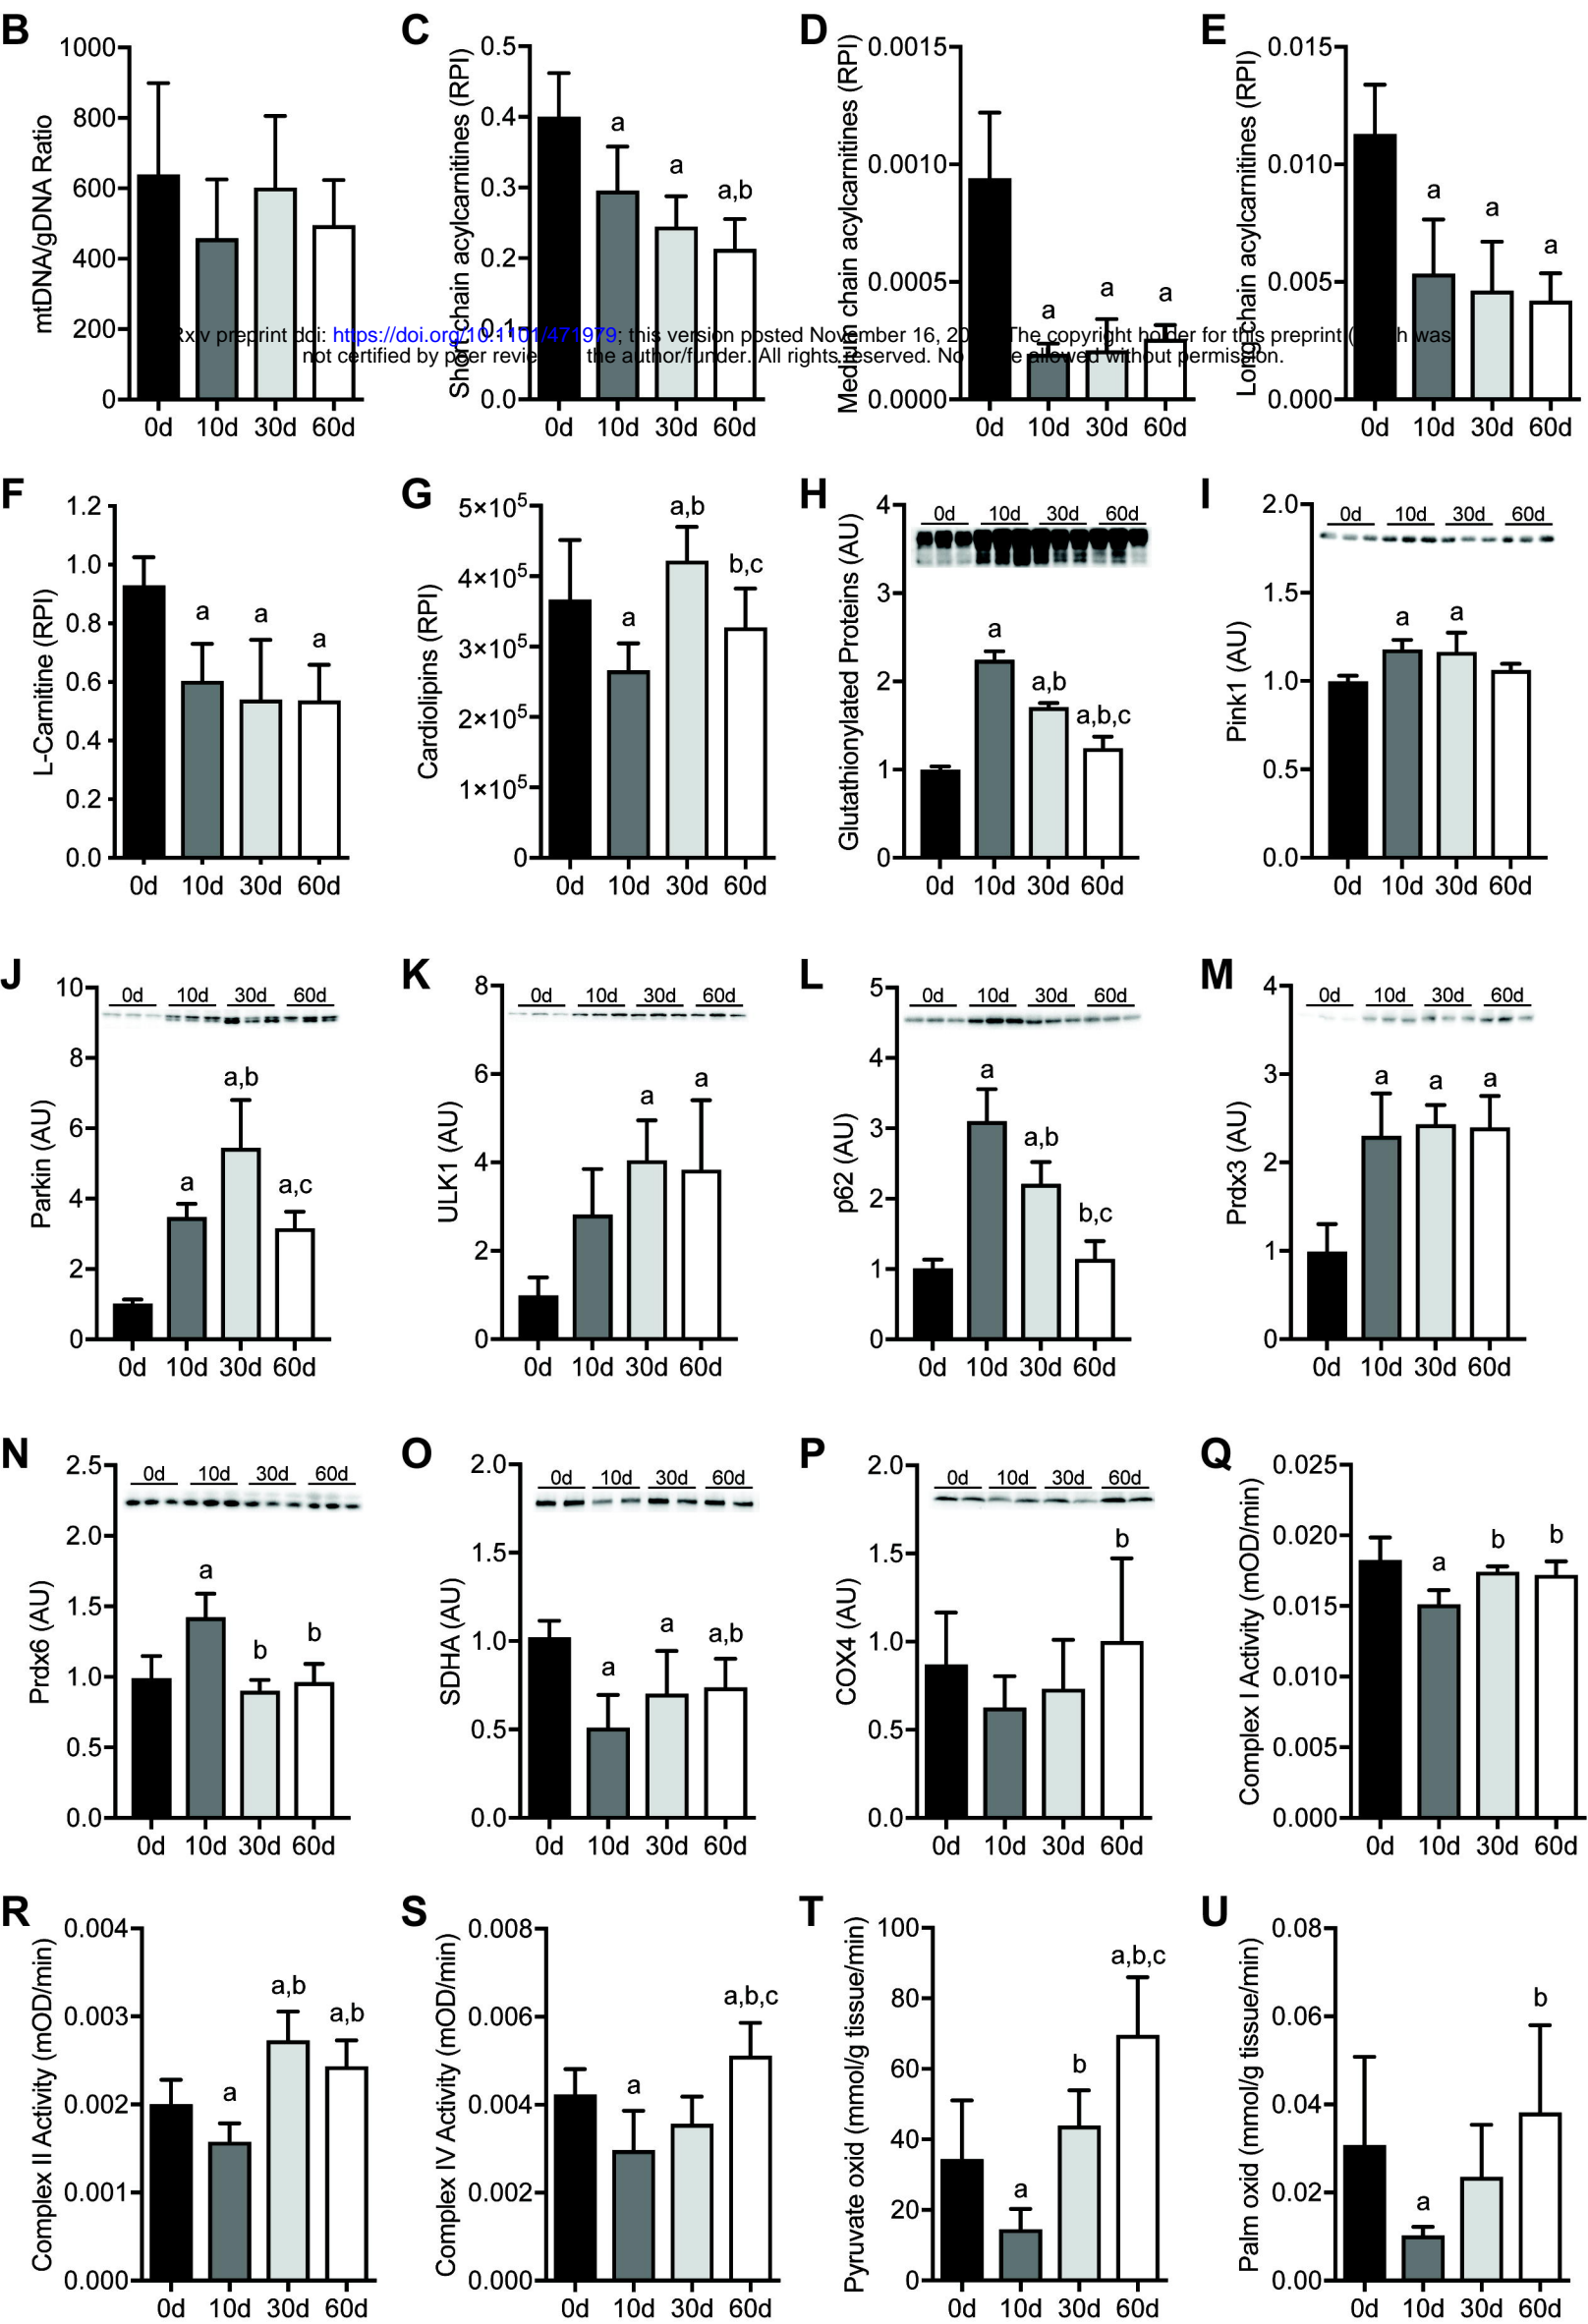

a, different ( $P < 0.05$ ) from 0d    b, different ( $P < 0.05$ ) from 10d    c, different ( $P < 0.05$ ) from 30d



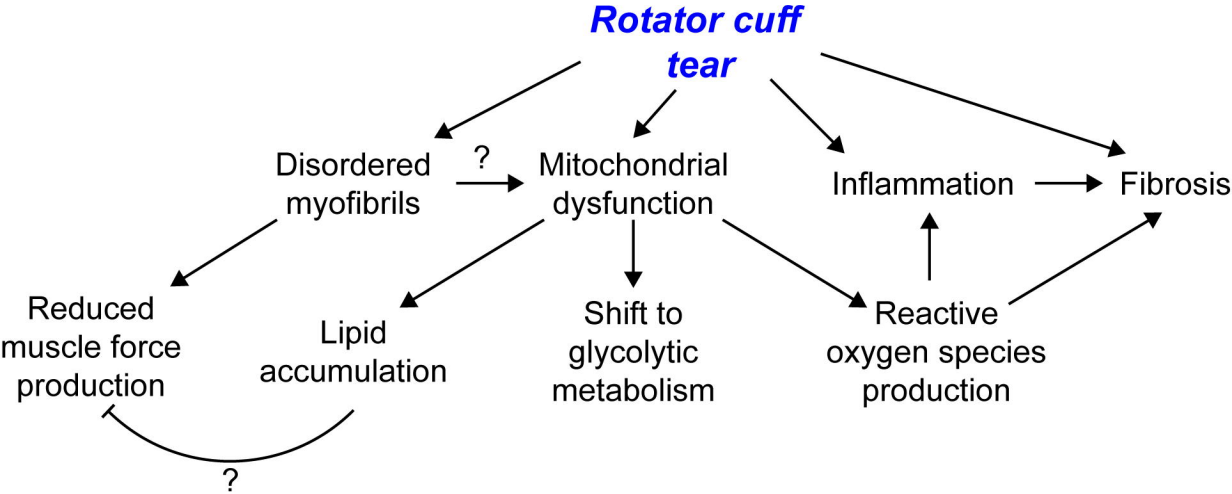

Source: https://www.biorxiv.org/content/10.1101/471979v1.full.pdf
